## **THE PARAVENTRICULAR THALAMUS IS A CRITICAL MEDIATOR OF TOP-DOWN CONTROL OF CUE-MOTIVATED BEHAVIOR IN RATS**

\*Paolo Campus<sup>a</sup>, \*Ignacio R. Covelo<sup>a</sup>, Youngsoo Kim<sup>b</sup>, Aram Parsegian<sup>a</sup>, Brittany N. Kuhn<sup>c</sup>, Sofia A. Lopez<sup>c</sup>, John F. Neumaier<sup>d</sup>, Susan M. Ferguson<sup>d</sup>, Leah C. Solberg Woods<sup>e</sup>, Martin Sarter<sup>b,c</sup>, Shelly B. Flagel<sup>a,b,f</sup>.

- a. Molecular and Behavioral Neuroscience Institute, University of Michigan, Ann Arbor, MI, USA.
- b. Department of Psychology, University of Michigan, Ann Arbor, MI, USA.
- c. Neuroscience Graduate Program, University of Michigan, Ann Arbor, MI, USA.
- d. Department of Psychiatry and Behavioral Sciences, University of Washington, Seattle, WA, USA.
- e. Department of Internal Medicine, Molecular Medicine, Center on Diabetes, Obesity and Metabolism, Wake Forest School of Medicine, Winston-Salem, NC, USA
- f. Department of Psychiatry, University of Michigan, Ann Arbor, MI, USA.

Corresponding author:

Shelly B. Flagel, Ph.D.  
Associate Professor  
Department of Psychiatry  
Molecular and Behavioral Neuroscience Institute  
University of Michigan  
Email: [sflagel@umich.edu](mailto:sflagel@umich.edu)  
Phone: 734-936-2033

Short title: THE PARAVENTRICULAR THALAMUS MEDIATES CUE-MOTIVATED BEHAVIOR

Keywords: Incentive salience, prelimbic cortex, paraventricular nucleus of the thalamus, nucleus accumbens, sign-tracking, dopamine

Number of Figures in the main text: 5

Number of tables in the main text: 0

Number of Figures in the supplemental results: 5

Number of tables in the supplemental results: 6

## **Abstract**

Cues in the environment can elicit complex emotional states, and thereby maladaptive behavior, as a function of their ascribed value. Here we capture individual variation in the propensity to attribute motivational value to reward-cues using the sign-tracker/goal-tracker animal model. Goal-trackers attribute predictive value to reward-cues, and sign-trackers attribute both predictive and incentive value. Using chemogenetics and microdialysis, we show that, in sign-trackers, stimulation of the neuronal pathway from the prelimbic cortex (PrL) to the paraventricular nucleus of the thalamus (PVT) decreases the incentive value of a reward-cue. In contrast, in goal-trackers, inhibition of the PrL-PVT pathway increases both the incentive value and dopamine levels in the nucleus accumbens shell. The PrL-PVT pathway, therefore, exerts top-down control over the dopamine-dependent process of incentive salience attribution. These results highlight PrL-PVT pathway as a potential target for treating psychopathologies associated with the attribution of excessive incentive value to reward-cues, including addiction.

## Introduction

Learning to associate environmental stimuli with the availability of valuable resources, such as food, is critical for survival. Such stimulus-reward associations rely on Pavlovian conditioning, a learning process during which a once neutral stimulus becomes a conditioned stimulus (CS), as it reliably predicts the delivery of an unconditioned stimulus (US) (e.g. food). The CS, then, attains predictive value and comes to elicit a conditioned response. Yet, we know from both preclinical and clinical studies that CSs can also acquire incentive value and elicit complex emotional and motivational states (Robinson & Berridge, 2008; Robinson & Flagel, 2009; Tibboel et al., 2015; Pool et al., 2016). When a CS is attributed with incentive salience and transformed into an incentive stimulus, it becomes attractive and desirable in its own right. That is, the CS becomes a “motivational magnet”, now capable of capturing attention and eliciting approach behavior (Berridge et al., 2009). However, individuals vary in their propensity to attribute incentive value to reward cues, and only for some individuals do such cues acquire inordinate control over behavior and the ability to elicit maladaptive tendencies (Flagel et al., 2007; Flagel et al., 2009) that are characteristic of psychopathology. Indeed, several psychiatric disorders have been associated with the excessive attribution of motivational significance to environmental cues, including substance use disorder (Robinson & Berridge, 1993; Berridge & Robinson, 2016; Kwako et al., 2017; MacNiven et al., 2018), eating disorders (Berridge, 2009; Robinson et al., 2014), gambling disorder (Limbrick-Oldfield et al., 2017), post-traumatic stress disorder (PTSD) (Coffey et al., 2010), and bipolar disorder (Mason et al., 2012; Whitton et al., 2015).

In recent years, an animal model has been established that enables us to parse the neurobiological mechanisms that may bias the way an individual responds to reward-cues. While the preferential use of predictive vs. incentive learning strategies may be adaptive under the right conditions; an extreme bias for the selective use of a single strategy may contribute to increased risk for psychopathology. When rats are exposed to a Pavlovian conditioned approach (PavCA) paradigm in which the presentation of a lever-CS is immediately followed by the response-independent delivery of food-US, distinct conditioned responses emerge. Some rats, goal-trackers

(GTs), approach the location of impending food delivery upon the lever-CS presentation, while others, sign-trackers (STs), approach and interact with the lever-CS itself. For both GTs and STs the lever-CS acquires predictive value and elicits a conditioned response, but for STs, the CS also acquires incentive value. This animal model, therefore, provides a unique platform to investigate the neurobiological determinants of individual differences in the propensity to attribute incentive salience to reward-cues.

Previous studies suggest that sign-tracking behavior results from enhanced activity in subcortical brain circuits known to mediate motivated behaviors, including the striatal dopamine system, the amygdala, and the hypothalamus (Flagel et al., 2011a; Flagel et al., 2011b; Saunders & Robinson, 2012; Yager et al., 2015; Singer et al., 2016; Haight et al., 2017). In addition, relative to GTs, STs appear to have deficits in top-down cognitive control originating in the prefrontal cortex (Paolone et al., 2013). Thus, we hypothesize that sign-tracking behavior arises from an imbalance between top-down cognitive control and bottom-up motivational processes. One brain region that is ideally situated to act as a fulcrum between cortical, limbic and homeostatic circuits is the paraventricular nucleus of the thalamus (PVT). The PVT receives cortical afferents from the medial PFC, including the infralimbic (IL) and prelimbic (PrL) cortices, and subcortical afferents from the hypothalamus, amygdala, and several brainstem regions involved in visceral functions and homeostatic regulation (Hsu & Price, 2007; Li & Kirouac, 2012; Kirouac, 2015). The PVT sends projections to various brain regions that have been associated with reward-learning and motivated behaviors, including the PrL and IL cortices, nucleus accumbens (NAc) core (NAcC) and shell (NAcS), lateral bed nucleus of the stria terminalis and central amygdala (Hsu & Price, 2007; Li & Kirouac, 2008; Hsu & Price, 2009). Recent findings surrounding the functional role of these PVT circuits (Do-Monte et al., 2015; Haight et al., 2017; Millan et al., 2017; Giannotti et al., 2018) have garnered recognition of the PVT as the “thalamic gateway” (Millan et al., 2017) for appetitive motivation; acting to integrate cognitive, emotional, motivational and viscerosensitive information, and, in turn, guide behavioral responses (Kirouac, 2015; Millan et al., 2017). Consistent with this view, the PVT has been implicated in the

propensity to attribute incentive motivational value to reward-cues (Haight & Flagel, 2014; Haight et al., 2015; Kuhn et al., 2018).

The functional connectivity of the PVT in response to cue-induced neuronal activity differentiates STs from GTs (Flagel et al., 2011a; Haight & Flagel, 2014; Haight et al., 2017). In STs, cue-induced activity in the PVT is correlated with activity in subcortical areas, including the NAc; whereas in GTs, cue-induced activity in the PVT is correlated with activity in the PrL (Flagel et al., 2011a; Haight & Flagel, 2014). Further investigation of PVT-associated circuitry in STs and GTs revealed that these phenotypes exhibit the same degree of cue-induced neural activity in PrL neurons that project to the PVT; but STs show greater cue-induced activity in subcortical afferents to the PVT, including the hypothalamus, and efferents from the PVT, including those to the NAc (Haight et al., 2017). These data suggest that the predictive value of the reward-cue is encoded in the PrL-PVT circuit. In STs, however, cognitive information about the predictive value of the reward-cue presumably competes with overriding subcortical motivational circuits, thus rendering them more prone to attribute incentive value. From this, we hypothesized that stimulating the PrL-PVT circuit (i.e. enhancing top-down control) in STs would reduce the tendency to attribute incentive value to a food-cue, by counteracting their inherent bias towards bottom-up/motivational mechanisms. In contrast, we hypothesized that inhibiting the PrL-PVT circuit (i.e. attenuating top-down control) in GTs would increase the tendency to attribute incentive value to a food-cue, by weakening the top-down cognitive component of the system and permitting bottom-up motivational mechanisms to act. Because the PVT sends dense projections to the NAc (Berendse & Groenewegen, 1990; Li & Kirouac, 2008; Kirouac, 2015), and can affect local dopamine (DA) release (Jones et al., 1989; Pinto et al., 2003; Parsons et al., 2007; Choi et al., 2012; Perez & Lodge, 2018), which is critical for incentive learning (Berridge and Robinson, 1998; Flagel et al., 2011; Saunders and Robinson, 2012), we also hypothesized that manipulations of PrL-PVT activity would affect extracellular DA levels in the NAcS, where PVT connections are most dense (Li & Kirouac, 2008). Specifically, we predicted that stimulation of the PrL-PVT circuit in STs would decrease DA, whereas inhibition of the PrL-PVT circuit in GTs would increase DA in the NAcS. To test these hypotheses, we used a dual-vector approach (Soudais et al., 2001; Boender

et al., 2014; Kerstetter et al., 2016) to express either the stimulatory Gq- or inhibitory Gi/o- DREADD (Designer Receptors Exclusively Activated by Designer Drugs) in neurons of the PrL that project to the PVT, and examined how bidirectional manipulations of this pathway affect the attribution of incentive salience to a food-cue (Experiment 1; Figure 1). In addition, we used in-vivo microdialysis to assess extracellular levels of DA in the NAcS following manipulations of the PrL-PVT pathway (Experiment 2, Figure 5a-f).

## Results

### Experiment 1

#### Acquisition of Pavlovian conditioned approach behaviors.

The average PavCA index from sessions 4-5 was used to classify rats as STs (PavCA index  $\geq +0.30$ ) or GTs (PavCA index  $\leq -0.30$ ) (Figure 2b). As explained in the Methods below, the intermediate population of rats (PavCA index between -0.30 and +0.30) were excluded from this study. Linear mixed-effects models showed a significant effect of phenotype, session and a significant phenotype x session interaction for all measures of sign- and goal-tracking behavior. Across the 5 sessions of PavCA training, STs showed a greater number of lever contacts ( $F_{4,184.225}=57.778$ ,  $p<0.001$ ), showed a greater probability to contact the lever ( $F_{4,303.698}=68.278$ ,  $p<0.001$ ), and had a lower latency to approach the lever ( $F_{4,336.578}=63.676$ ,  $p<0.001$ ) (Figure 2c-e). These significant differences were apparent during sessions 1-5 of PavCA training (post-hoc analyses,  $P<0.001$ ). In contrast, across the 5 sessions of PavCA training, GTs showed a greater number of magazine entries ( $F_{4,243.952}=57.436$ ,  $p<0.001$ ), a greater probability to enter the magazine ( $F_{4,225.359}=76.968$ ,  $p<0.001$ ), and a lower latency to enter the magazine ( $F_{4,348.976}=71.788$ ,  $p<0.001$ ) (Figure 2f-h), and these significant differences were apparent for all measures during PavCA sessions 2-5 (post-hoc analyses,  $p<0.05$ ).

Experimental groups (i.e. G-protein coupled receptor (GPCR) and treatment groups) were counterbalanced based on the average PavCA index from sessions 4-5 (Fig 2i). A three-way ANOVA (phenotype x GPCR x treatment) showed a significant effect of phenotype ( $F_{1,114}=2685.054$ ,  $p<0.001$ ) on PavCA index (Fig 2i), but no

significant effects of GPCR or treatment groups, and no significant interactions (see also Supplementary file 1 and 2).

### **PavCA rescreening vs. PavCA test**

PavCA index is presented as the primary dependent variable in the main text, but analyses for other dependent variables indicative of Pavlovian conditioned approach behavior including, contacts, probability and latency directed towards either the lever-CS or food magazine are included in Supplementary file 3 and 4. PavCA index during each daily session of rescreening is presented in Figure 3-figure supplement 1.

**Stimulation of the PrL-PVT pathway attenuates the incentive value of the food cue in STs.** Stimulation of the PrL-PVT pathway in STs significantly decreased the PavCA index (Fig 3c), which, in this case, is reflective of both a decrease in lever-directed behaviors (Supplementary file 3) and an increase in goal-directed behaviors (Supplementary file 4). There was a significant effect of treatment ( $F_{1,23}=33.251$ ,  $p<0.001$ ), session ( $F_{1,23}=10.799$ ,  $p=0.03$ ), and a significant treatment x session interaction ( $F_{1,23}=14.051$ ,  $p=0.01$ ,  $1-\beta=1$ ) for the PavCA index. Post-hoc analyses revealed a significant difference between VEH- and CNO-treated STs during both rescreening ( $p=0.005$ , Cohen's  $d=1.27$ ) and test ( $p<0.001$ , Cohen's  $d=2.74$ ). The significant difference between treatment groups during rescreening, prior to actual treatment, is due, in part, to the fact that counterbalancing was disrupted once animals were eliminated because of inaccurate DREADD expression. Importantly, however, only the CNO-treated rats exhibited a change in behavior during the test sessions relative to rescreening ( $p<0.001$ , Cohen's  $d=1.18$ ). For GTs (Fig 3d), there was not a significant effect of treatment ( $F_{1,10}=0.169$ ,  $p=0.690$ ), session ( $F_{1,10}=0.511$ ,  $p=0.491$ ) nor a significant treatment x session interaction ( $F_{1,10}=0.351$ ,  $p=0.567$ ). The modest sample size ( $n=6$ ) may have contributed to the lack of effects in GT-Gq, as suggested by a post-hoc power analysis ( $1-\beta=0.27$ ). Nonetheless, taken together, these results suggest that “turning on” the top-down PrL-PVT circuit appears to selectively attenuate the incentive value of the cue in STs.

**Inhibition of the PrL-PVT pathway increases the incentive value of the food cue in GTs.** Inhibition of the PrL-PVT pathway in GTs significantly increased the PavCA index



(Figure 3f). This effect appears to be driven primarily by a change in the “response bias” score ( $F_{1,30}=4.136$   $p=0.051$ , Cohens  $d=1.04$ ,  $1-\beta=0.99$ ; *data not shown*), which is a measure of:  $[(\text{total lever-CS contacts} - \text{total food magazine entries}) / (\text{total lever-CS contacts} + \text{total food magazine entries})]$  (Meyer et al., 2012). Other specific metrics of lever- or magazine-directed behaviors were not significantly different between treatment groups (Supplementary file 3 and 4). For PavCA index, however, there was a significant effect of treatment ( $F_{1,30}=5.975$ ,  $p=0.021$ ), session ( $F_{1,30}=7.106$ ,  $p=0.012$ ), and a significant treatment x session interaction ( $F_{1,30}=4.403$ ,  $p=0.044$ ,  $1-\beta=0.98$ ). Post-hoc analyses revealed that inhibiting the PrL-PVT pathway increased the PavCA index relative to both the rescreening session ( $p=0.002$ , Cohen’s  $d=0.85$ ) and to VEH controls during the test session ( $p=0.012$ , Cohen’s  $d=0.96$ ). For STs (Fig 3e), there was not a significant effect of treatment ( $F_{1,12}=0.876$ ,  $p=0.368$ ), session ( $F_{1,12}=4.359$ ,  $p=0.059$ ), nor a significant treatment x session interaction ( $F_{1,12}=1.479$ ,  $p=0.247$ ,  $1-\beta=0.85$ ), suggesting that “turning off” the PrL-PVT pathway permits the attribution of incentive motivational value to a reward-cue selectively in GTs.

**CNO administration in the absence of DREADD receptors does not affect the Pavlovian conditioned approach response in STs or GTs.** Administration of CNO in the absence of DREADD had no effect on behavior during PavCA in either STs or GTs (Fig 3g and h, respectively).

**Behavior during the intertrial interval was not affected by manipulation of the PrL-PVT pathway or by administration of CNO in the absence of DREADD receptors.**

To assess the effects of manipulating the PrL-PVT pathway on general locomotor activity and motivated behavior, we examined head entries into the food magazine during the intertrial interval (ITI), when the lever-CS was not present (Figure 3-figure supplement 2). Consistent with prior findings, head entries into the food magazine during the ITI tended to decrease with training; thus responses during the “test” sessions were generally less than those during the “rescreening” sessions (see statistics in Figure 3-figure supplement 2 legend). Importantly, however, there were no significant effects of treatment and no significant interactions for this metric for either phenotype or any of the experimental groups (i.e. Gq, Gi, No-DREADD controls). It should also be noted, that all rats continued to consume all of their food pellets during



the ITI, regardless of treatment. Thus, the effects described above following manipulation of the PrL-PVT circuit appear to be specific to Pavlovian conditioned approach behavior and not reflective of a change in general locomotor activity or motivated behavior.

### **Conditioned reinforcement test**

A conditioned reinforcement test (CRT) was conducted to assess the reinforcing properties of the lever-CS (Robinson and Flagel, 2009). During this test, responses into a port designated “active” results in the brief presentation of the lever-CS; whereas those in the “inactive” port have no consequence. If a rat responds more into the active port relative to the inactive port, the lever-CS is considered to have reinforcing properties (Robinson & Flagel, 2009). Moreover, if the rat approaches and interacts with the lever-CS during its brief presentation, it is considered to have incentive properties (Robinson & Flagel, 2009; Hughson et al., 2019). Here we use the incentive value index, a composite metric ((pokes in active port + lever-CS contacts) – (pokes in inactive port)) as a primary measure of the conditioned reinforcing properties of the lever-CS (Figure 4; see also Hughson et al., 2019) and additionally report nosepoke responding and lever-CS contacts in Figure 4-figure supplement 1.

**Stimulation of the PrL-PVT pathway attenuates the conditioned reinforcing properties of a reward-cue in STs.** Stimulation of the PrL-PVT pathway in STs significantly attenuated the incentive value index during the CRT ( $t_{25} = -3.574$ ,  $p = 0.002$ , Cohen's  $d = 1.48$ ,  $1 - \beta = 0.92$ , Figure 4b). The same manipulation had no effect on the incentive value index in GTs (Figure 4c). In agreement, there was a significant effect of treatment ( $F_{1,36} = 19.021$ ,  $p < 0.001$ ), port ( $F_{1,36} = 30.501$ ,  $p < 0.001$ ) and a significant treatment x port interaction ( $F_{1,36} = 7.024$ ,  $p = 0.012$ ) for nosepoke responding for STs (Figure 4-figure supplement 1a). Post-hoc analysis revealed that, relative to VEH controls, stimulation of the PrL-PVT in STs decreased the number of nosepokes into the active port ( $p < 0.001$ , Cohen's  $d = 1.55$ ). Furthermore, while VEH-treated controls responded more in the active port relative to the inactive port ( $p < 0.001$ , Cohen's  $d = 2.421$ ), this discrimination between ports was abolished following CNO treatment

( $p=0.061$ ). Similarly, stimulation of the PrL-PVT pathway reduced the number of lever contacts in STs ( $t_{18,142} = -3.615$ ,  $p < 0.05$ , Cohen's  $d=1.47$ , Figure 4-figure supplement 1g). For GTs, there was not a significant effect of treatment, port, nor a significant treatment x port interaction for nosepoke responding (Figure 4-figure supplement 1b), nor a significant effect of treatment for lever-CS interactions (Figure 4-figure supplement 1h). These data are consistent with those reported above for PavCA behavior, as “turning on” this top-down cortico-thalamic control attenuates the incentive value of a food-cue selectively in STs.

**Inhibition of the PrL-PVT pathway does not affect the conditioned reinforcing properties of a reward-cue in either STs or GTs.** Inhibition of the PrL-PVT pathway did not affect the incentive value index for either phenotype (Figure 4d, 4e). For STs, there was a significant main effect of port ( $F_{1,30} = 30.696$ ,  $p < 0.001$ ), for which both VEH- and CNO-treated rats responded more in the active port (Figure 4-figure supplement 1c). For GTs, there was a significant main effect of treatment ( $F_{1,56} = 9.608$ ,  $p = 0.03$ ) and port ( $F_{1,56} = 23.707$ ,  $p < 0.001$ ), but there was not a significant treatment x port interaction (Figure 4-figure supplement 1d). Thus, CNO-treated rats responded more than VEH controls, but they did so across ports (i.e. in both the active and inactive ports); and all GT rats responded more in the active port relative to the inactive port. Inhibition of the PrL-PVT did not affect lever-CS interaction in either phenotype (Figure 4-figure supplement 1, j) during the CRT test. Potential explanations for the seemingly incongruent effects of PrL-PVT inhibition on Pavlovian conditioned approach behavior and the conditioned reinforcing properties of the reward cue in GTs are discussed below.

**CNO administration in the absence of DREADD receptors does not affect the conditioned reinforcing properties of a reward-cue in STs or GTs.** Administration of CNO in the absence of DREADD did not affect the incentive value index during CRT in either STs (Figure 4f) or GTs (Figure 4g). For nosepoke responding, there was a significant main effect for port, for which both STs ( $F_{1,26} = 15.521$ ,  $p = 0.001$ ) and GTs ( $F_{1,26} = 8.492$ ,  $p = 0.007$ ) responded more in the active port relative to the inactive port. There was not a significant effect of treatment, nor a significant treatment x port interaction for either phenotype, suggesting that CNO administration did not affect the

conditioned reinforcing properties of the reward cue (Figure 4-figure supplement 1e-f). In agreement, CNO administration did not affect lever-CS interaction during the CRT (Figure 4-figure supplement 1k-l).

## Experiment 2

### Acquisition of Pavlovian conditioned approach.

Based on the results of Experiment 1, Experiment 2 focused on STs expressing Gq-DREADD (ST-Gq) and GTs expressing Gi-DREADD (GT-Gi) in neurons of the PrL that project to the PVT (both aPVT and pPVT). For this Experiment, the PavCA index from session 3 was used to classify rats as STs and GTs. Since a conditioned response is not fully developed by session 3, different criteria were used for classification. Rats with a PavCA index  $\geq +0.20$  were classified as STs, and rats with an index  $\leq -0.20$  were classified as GTs (Fig 5g). Intermediate rats with a PavCA index between  $-0.2$  and  $+0.2$  ( $n=18$ ) were excluded from the remainder of Experiment 2, and subjects with inaccurate DREADD expression and/or with incorrect microdialysis probe placement ( $n=23$ ) were excluded from the statistical analyses, resulting in a final number of 23 rats (GT-Gi=10, ST-Gq=13). Analyses of the acquisition of sign- and goal-tracking behaviors across sessions 1-3 of PavCA training is reported in Supplementary file 5 and 6.

**Stimulation of the PrL-PVT pathway does not affect the attribution of incentive value to a food cue or the neurochemical profile of the NAcS in STs.** Stimulating the PrL-PVT pathway in STs did not affect behavior early in PavCA training (i.e. sessions 3-6; Figure 5h, see also Supplementary file 7 and 8). These findings suggest that the PrL-PVT pathway mediates the incentive value of a food-cue once the sign-tracking response is acquired, but not during the acquisition process. For microdialysis, there was not a significant effect of treatment (CNO, VEH), time (5-min bins), nor a significant interaction for any of the molecules examined in STs (Fig 5j). Noteworthy, however, is a visible trend (Figure 5k;  $p=0.153$ ) and strong effect size for DA (Cohen's  $d=1.26$ ), suggesting that stimulation of the PrL-PVT pathway in STs decreases DA in the NAcS. Yet, consistent with the fact that there were no significant behavioral effects in STs following the same manipulation, there was also not a significant correlation between average DA and PavCA index (Figure 5l). The modest sample size ( $n=6/7$  for

behavior,  $n=4$  per group for microdialysis) may have played a role in the lack of statistical effects in ST-Gq, as suggested by post-hoc power analyses ( $1-\beta=0.21$  for behavior;  $1-\beta=0.28$  for microdialysis).

**Inhibition of the PrL-PVT pathway increases the propensity to attribute incentive value to a food cue and DA levels in the NAcS in GTs.** Inhibiting the PrL-PVT pathway early in training in GTs resulted in an enhancement of the incentive motivational value of the reward-cue (effect of treatment ( $F_{1,8}=10.722$ ,  $p=0.011$ ); treatment x session interaction ( $F_{1,8}=7.163$ ,  $p=0.028$ ; Figure 5i). This effect was primarily due to a decrease in magazine-directed behaviors (Figure 5-supplementary file 3 and 4). Post-hoc analysis revealed that CNO treatment significantly increased the PavCA index relative to session 3 ( $p=0.016$ , Cohen's  $d=2.40$ ), and relative to VEH-treated rats on session 6 ( $p<0.05$ , Cohen's  $d=1.94$ ). Despite the small sample size ( $n=5$  per group) a post-hoc power analysis revealed sufficient power to detect an effect ( $1-\beta=0.95$ ). Thus, inhibition of the PrL-PVT circuit early in training enhances the incentive motivational value of a reward-cue in GTs.

While GABA, Glu, 5-HT and Ach did not differ as a function of treatment or time (Figure 5m), DA did (effect of treatment ( $F_{1,9.067}=11.145$ ,  $p=0.009$ ); treatment x time interaction ( $F_{6,50.149}=3.765$ ,  $p=0.004$ )). Relative to VEH-treated rats, CNO treatment resulted in a significant increase in extracellular levels of dopamine across the time-sampling period (Figure 5m); and the same pattern was evident when the average levels of DA were compared ( $t_8=2.925$ ,  $p<0.019$ , Cohen's  $d=1.90$ ,  $1-\beta=0.82$ , Figure 5n). Thus, in GTs, inhibition of the PrL-PVT circuit increases sign-tracking behavior and concomitantly increases DA in the NAcS. Furthermore, there was a significant positive correlation between percent change in DA and PavCA index ( $F_{1,9}=91.563$ ,  $p<0.001$ ;  $r^2=0.92$ ), suggesting that DA accounts for more than 90% of the variance in behavior (Figure 5o).

## Discussion

The work presented here highlights the PVT as a central node in the integration of top-down and bottom-up circuits involved in the attribution of incentive motivational value to a Pavlovian food-cue. Specifically, we tested the hypothesis that the PrL-PVT

circuit serves to suppress the propensity to attribute incentive value to Pavlovian reward-cues, and that the efficacy of this mechanism is dependent on individual differences in cue-motivated behavior. In support, we found that “turning on” the PrL-PVT pathway via chemogenetic stimulation attenuates the incentive motivational value of a food-cue in sign-tracking rats—those that exhibit a natural propensity to attribute excessive incentive motivational value to such cues—without affecting the behavior of goal-tracking rats. Conversely, “turning off” the PrL-PVT pathway via chemogenetic inhibition appears to permit the attribution of incentive motivational value to reward cues in GTs, without affecting the behavior of STs.

The current data are consistent with the notion that, in STs, hyper-activation of bottom-up motivational circuits projecting to the PVT override the top-down cognitive information coming from the PrL (Haight et al., 2017), thus rendering these individuals more prone to attribute incentive value to a food-paired cue. Here we show that this configuration can be altered with stimulation of the PrL-PVT pathway which, presumably, via the PVT, attenuates subcortical drive and updates the behavioral output, resulting in a reduction in sign-tracking behavior. Such an interpretation also explains the lack of effects observed in STs expressing Gi in the PrL-PVT pathway. In these rats, inhibition of the PrL-PVT pathway is without effect because the relative predominance of bottom-up processes remains intact. In contrast, in GTs, top-down processes appear to dominate over subcortical processes (Paolone et al., 2013; Haight et al., 2017; Koshy Cherian et al., 2017). As a result, GTs are more goal-driven and more inclined to attribute predictive, but not incentive, value to reward-cues. Thus, inhibition of the PrL-PVT pathway in GTs minimizes the top-down control of the PVT, permitting bottom-up signals to gain a relatively greater influence over their behavior. As a result of this shift in balance, GTs show an increase in the expression of sign-tracking behavior. Correspondingly, stimulation of the PrL-PVT pathway in GTs is without effect, as this manipulation merely reinforces the innate top-down control over behavior in these individuals.

For STs, a discrete food-associated cue is able to elicit approach behavior and support the learning of a new instrumental response, or act as a potent conditioned reinforcer (Robinson & Flagel, 2009; Meyer et al., 2012). Thus, we wanted to determine

if the PrL-PVT pathway plays a role in the ability of a food-cue to act as a conditioned reinforcer (Berridge et al., 2009; Robinson & Flagel, 2009). Although different neural mechanisms are known to contribute to Pavlovian conditioned approach behavior and the conditioned reinforcing effects of Pavlovian cues (Cardinal et al., 2002), the PrL-PVT pathway appears to play a prominent role in both, at least for STs. That is, in STs, stimulation of the PrL-PVT circuit reduces both sign-tracking behavior and the conditioned reinforcing properties of the reward cue. In GTs, however, inhibition of the PrL-PVT pathway did not affect responding during a test of conditioned reinforcement. Although these findings may seem inconsistent with the increase in sign-tracking behavior following this manipulation in GTs, it is important to note that “turning off” this top down control did not switch the behavioral phenotype of GTs to STs. In fact, there was only a moderate increase in the PavCA index. Thus, while inactivation of the PrL-PVT pathway permits the attribution of incentive value to the cue to the extent that it elicits sign-tracking behavior in GTs, the ascribed value is not sufficient to support conditioned reinforcement.

As sign-tracking, but not goal-tracking, behavior is dopamine-dependent, we were also interested in determining whether the chemogenetic manipulations that altered behavior would also affect extracellular levels of DA in the NAc. To this end, we assessed the effects of stimulation (in STs) or inhibition (in GTs) of the PrL-PVT pathway on the neurochemical profile of the NAcS, a subregion of the ventral striatum particularly rich in glutamatergic fibers coming from the PVT (Li & Kirouac, 2008; Vertes & Hoover, 2008). For these studies, the effects of PrL-PVT manipulation were examined early in Pavlovian training, when Pavlovian cues are known to evoke a DA response in the NAc to a different degree in STs and GTs (Flagel et al., 2011a; Clark et al., 2013). Although we expected to observe more robust behavioral effects during this period, we found that stimulation of the PrL-PVT pathway early in Pavlovian training did not affect the behavior of STs, nor did it significantly affect extracellular levels of DA or other neurotransmitters in the NAcS. In contrast, inhibition of the PrL-PVT pathway early in Pavlovian training increased the tendency to sign-track in GTs, and concomitantly increased extracellular levels of DA in the NAcS, without affecting other neurotransmitters. Thus, in STs, the effects of PrL-PVT stimulation are apparent only

after extended Pavlovian conditioning (i.e. Experiment 1); whereas, in GTs, the effects of PrL-PVT inhibition are consistent during early and late stages of Pavlovian conditioning (i.e. in both Experiment 1 and 2).

This pattern of results is likely due to distinct neural mechanisms regulating behavior during “learning” vs “performance”. We speculate that the exaggerated contribution of bottom-up processes that characterize STs (e.g. DA release in the NAc) is stronger during the early sessions of training, when the sign-tracking response is still being learned, compared to that after extended training, once the conditioned response has been acquired. Indeed, there is a shift in the neurobiological substrates that mediate the incentive motivational properties of reward cues after prolonged training, such that the dopamine encoding of Pavlovian incentive stimuli eventually diminishes (Clark et al., 2013). Therefore, potentiating the top-down communication between the PrL and the PVT during early training may not be strong enough to overcome the subcortical activity surrounding the PVT in STs during this “critical period” of incentive learning. After learning has taken place, however, subcortical mechanisms may be less critical and, as a consequence of this, sign-tracking behavior may be more malleable, and vulnerable to top-down control. In contrast, in GTs, inhibition of the PrL-PVT circuit increases both the acquisition (learning) and expression (performance) of sign-tracking behaviors, and this effect seems to be even more pronounced early in training. It seems, therefore, that permitting a shift towards bottom-up processing during the acquisition of Pavlovian conditioned approach behaviors results in dopamine-dependent incentive learning, and the PVT appears to act as a fulcrum in this regard. Further, these data suggest that the predominance of bottom-up processes that contribute to sign-tracking behavior can occur via innate mechanisms (i.e. in STs), or by “turning off” top-down control mechanisms (i.e. in GTs). Ongoing studies will determine whether chemogenetic or optogenetic manipulations of bottom-up processes can similarly alter individual differences in cue-motivated learning strategies.

It has become increasingly apparent in recent years that the PVT and its associated circuitry play an important role in motivated behaviors, including those related to addiction and anxiety-related disorders (Coffey et al., 2010; Do-Monte et al., 2015; Matzeu et al., 2015; Zhu et al., 2016; Choi & McNally, 2017; Do-Monte & Kirouac,



2017; Do-Monte et al., 2017; Matzeu et al., 2017; Millan et al., 2017; Otis et al., 2017; Beas et al., 2018; Giannotti et al., 2018; Zhu et al., 2018; Choi et al., 2019). Here, we honed in on the PrL-PVT pathway and exploited an animal model of individual differences in cue-reward learning to demonstrate that this circuit acts as a top-down control mechanism to suppress the attribution of incentive value to a food-paired cue. Furthermore, we showed that it does so by affecting the concomitant subcortical processes that instead promote incentive learning, such as DA release in the NAcS. Taken together, these findings identify the PVT as a central node in the integration of top-down and bottom-up mechanisms involved in the attribution of incentive value to reward-cues. The cortico-thalamic-striatal circuitry elucidated here should be considered as a possible target for new therapeutic interventions to prevent the development of, or treat, cue-motivated psychiatric disorders in vulnerable individuals.

## Methods and Materials

### Common Methods

**Subjects.** A total of 428 male heterogeneous stock (N/NIH-HS) rats from the breeding colony at the Medical College of Wisconsin (LSW, now at Wake Forest School of Medicine) were used for Experiment 1. As we were interested only in assessing STs and GTs, rats with a PavCA index between -0.3 and +0.3 (intermediate rats,  $n = 182$ ) were excluded from the remainder of Experiment 1. Of the remaining 246 rats, 55 were excluded from the analysis because their phenotype changed between the initial testing and rescreening (27 GTs became STs, 26 GTs and 2 STs became intermediate responders). Sixty-five rats were excluded because of inadequate or off-target DREADD expression in the PrL, aPVT or pPVT, resulting in a final  $n = 126$  rats (GT-Gi= 35 (18 VEH/17 CNO), GT-Gq= 12 (6 VEH/6 CNO), ST-Gi= 17 (10 VEH/7 CNO), ST-Gq= 27 (14 VEH/13 CNO), GT-No DREADD= 17 (8 VEH/9 CNO), ST-No DREADD= 18 (8 VEH/10 CNO)). Data for Experiment 1 were collected across 8 rounds of testing.

Given the results obtained from Experiment 1, Experiment 2 focused on ST rats expressing Gq (ST-Gq) and GT rats expressing Gi (GT-Gi) in the PrL-PVT pathway. A total of 64 male Sprague-Dawley (Charles River Saint-Constant, Canada and Raleigh,

NC, USA) rats were used for this study. Intermediate rats with a PavCA index between -0.2 and +0.2 (n= 18) were excluded from the remainder of Experiment 2. Subjects with inadequate or off-target DREADD expression in the PrL, aPVT or pPVT, or with incorrect microdialysis probe placement (n= 23) in the nucleus accumbens shell were excluded from the statistical analysis, resulting in a final number of 23 rats (GT-Gi= 10 (5 VEH/5 CNO), ST-Gq= 13 (7 VEH/6 CNO)). Technical difficulties during sample collection and/or chemical analysis led to the elimination of 5 ST-Gq samples. Thus, the final number of ST-Gq rats for the microdialysis data was 8 (4 VEH, 4 CNO). Animals from Experiment 2 were tested across 4 different experimental rounds.

All rats were 7-9 weeks old at the time of arrival and were housed in a climate-controlled room (22±2 °C) with a 12-hour dark-light cycle (lights on at 06:00 AM or 07:00 AM depending on daylight savings time) and allowed to acclimate to the colony room for at least 1 week prior to handling. All rats from Experiment 1 had *ad-libitum* access to food and water and were paired-housed for the duration of the experiments. Rats from Experiment 2 were single-housed after cannula implantation to avoid damage to the implants. Behavioral testing took place during the light cycle between 11:00 AM and 5:00 PM. All procedures followed The Guide for the Care and Use of Laboratory Animals: Eighth Edition (2011, National Academy of Sciences) and were approved by the University of Michigan Institutional Animal Care and Use Committee.

**Viral Vectors.** Double-floxed hM<sub>3</sub>D(Gq) (AAV5-hSyn-DIO-hM<sub>3</sub>Dq-mCherry, titer of 4.8 x 10<sup>12</sup> vg/μL) or hM<sub>4</sub>D(Gi) DREADDs (AAV-hSyn-DIO-hM<sub>4</sub>Di-mCherry, titer of 1.9 to 2.5 x 10<sup>13</sup> vg/μL) were obtained from the University of North Carolina vector core. Canine adenovirus expressing Cre (CAV2-Cre, titer of ~ 2.5 x 10<sup>9</sup> vg/μL) was obtained from Dr. Neumaier at the University of Washington.

**Drugs.** Clozapine-N-oxide (CNO) was obtained from the National Institute of Mental Health (NIMH). CNO was dissolved in 6% dimethylsulfoxide (DMSO) in sterile water and administered intraperitoneally (i.p.) at a dose of 3.0 mg/kg. A 6% DMSO solution in sterile water was used as the vehicle (VEH) control.

**Pavlovian conditioned approach (PavCA).**

**Apparatus.** PavCA training occurred inside Med Associates chambers (St. Albans, VT, USA; 30.5 × 24.1 × 21 cm) located in sound-attenuating cabinets with a ventilation fan to mask background noise. Each chamber contained a food magazine located in the center of one wall located 3 cm above the grid floor, connected to an automatic pellet dispenser. A retractable backlit metal lever was located either to the left or right of the food magazine, 6 cm above the grid floor. A house light was located on the wall opposite to the food magazine and lever, 1 cm from the top of the chamber. Magazine entries were recorded upon break of a photo-beam located inside the magazine and a lever contact was registered upon deflection, which required a minimum of a 10-g force.

**PavCA procedures.** PavCA procedures were the same as those described previously (Meyer et al., 2012). For two days before the start of behavioral procedures, rats were handled by the experimenters and given ~25 banana-flavored food pellets (45 mg dustless pellets, Bio-Serv, Flemington, NJ, USA) in order to familiarize them with the food reward that served as the US during PavCA training. After this period, rats underwent two pre-training sessions, consisting of 25 trials in which a food pellet was delivered into the food magazine on a variable time (VT) 30-s schedule (range 0-60 s). During pre-training, head entries into the food magazine were recorded to ensure that rats retrieved all of the food pellets. Each session lasted approximately 12.5 minutes. After pre-training, rats underwent one daily session of PavCA training for 5 consecutive days. Each PavCA training session consisted of 25 trials under a VT-90 s schedule (range 30-150 s), during which the presentation of an illuminated lever-CS for 8 seconds was followed by the delivery of a banana-flavored food pellet into the food magazine. Thus, each trial of lever-CS/food-US pairing occurred, on average, every 90-s, within an intertrial interval range of 30-150 s. The start of PavCA training was signaled by illumination of the house light and lasted an average of 40 minutes. For each PavCA session, the number of lever-CS contacts and head entries into the food magazine, the probability of contacting the lever-CS or entering the food magazine, and the latency to contact the lever-CS or to enter the food magazine during each trial were recorded. These measures were used to calculate a PavCA index as previously described (Meyer et al., 2012). Briefly, the PavCA index is a composite score that captures the propensity to approach the lever-CS relative to the food magazine. It is

calculated by averaging 3 distinct measures: 1) response bias  $[(\text{total lever-CS contacts} - \text{total food magazine entries}) / (\text{total lever-CS contacts} + \text{total food magazine entries})]$ , 2) probability difference  $[\text{Prob}(\text{lever}) - \text{Prob}(\text{food magazine})]$  and, 3) latency difference  $[-(\text{latency to contact the lever-CS} - \text{latency to enter the food magazine})/8]$ . The PavCA index ranges from +1 to -1. A score of -1 indicates an extreme GT whose conditioned responses are always directed toward the food magazine, while a score of +1 indicates an extreme ST whose conditioned responses are always directed toward the lever-CS. For experiment 1, rats with an average PavCA index  $\geq +0.30$  during session 4 and 5 were classified as STs, while rats with an index  $\leq -0.30$  were classified as GTs. For Experiment 2, rats with an average PavCA index  $\geq +0.20$  during session 3 were classified as STs, while rats with an index  $\leq -0.20$  were classified as GTs.

**Surgery.** For both Experiments 1 and 2, a dual-vector approach was used to selectively express DREADD receptors in neurons of the PrL that project to the aPVT and pPVT. Rats were deeply anesthetized using 5% inhaled isoflurane (Isothesia - Butler-Schein, Columbus, OH) and the anesthetic plane was maintained with 2% inhaled isoflurane for the duration of the surgery. Prior to surgeries, while under anesthesia, rats received an injection of carprofen (5mg/kg, s.c.) for analgesia and were further prepared for surgeries by shaving the scalp and applying betadine (Purdue Products, Stamford, CT) followed by 70% alcohol as an antiseptic. Rats were then placed into a stereotaxic frame (David Kopf instruments, Tujunga, CA or Stoelting, Wood Dale, IL) and a small incision was made on the scalp to expose the skull. Two small holes were drilled above the PrL (bilaterally) and above the anterior PVT (aPVT) and posterior PVT (pPVT) using Bregma coordinates as indicated below. Cre-dependent DREADD viruses (Gq or Gi) were bilaterally injected into the PrL (from bregma: +3.0 mm AP;  $\pm 1.0$  mm ML; -4 mm DV) at a rate of 200 nL per minute over a 5-min period (1  $\mu$ L total). CAV2-Cre was injected at a 10° angle into the aPVT (from bregma: -2.0 mm AP; -1 mm ML; -5.4 mm DV) and pPVT (from bregma: -3.0 mm AP; -1 mm ML; -5.5 mm DV) at a rate of 50 nL per minute for 2 minutes (100 nL total volume). Following delivery, injectors were left in place for an additional 5 minutes to allow diffusion. For Experiment 2, rats were additionally implanted with a guide cannula (CMA 12, Harvard Apparatus, Holliston, MA), counterbalanced in the left or right NAcS (from bregma: +1.3 mm AP;  $\pm 0.8$  mm

ML; -5.2 mm DV). Cannulas were secured to the skull with stainless steel screws and acrylic cement (Bosworth New Truliner, Keystone Industries, Gibbstown, NJ). Removable stylets were placed in the guide cannulas to avoid clogging. Behavioral tests were conducted 3-5 weeks following surgery.

**Perfusion and tissue processing.** Approximately one week after completing the behavioral experiments, rats were anesthetized with ketamine (90 mg/kg i.p.) and xylazine (10 mg/kg i.p.) and transcardially perfused with 0.9% saline followed by 4% formaldehyde (pH= 7.4) for fixation. Brains were extracted, post-fixed in 4% formaldehyde for 24 hours at 4°C and immersed in increasing concentrations of sucrose solutions every 24 h (10%, 20% then 30% sucrose in 0.1M PBs, pH= 7.4) at 4°C over the course of 3 days. Brains were then encased in Tissue-Plus O.C.T. (Fisher HealthCare, Houston, TX), frozen using dry ice and subsequently sectioned in the coronal plane (40 µm) using a cryostat (Leica Biosystems Inc, Buffalo Grove, IL). For Experiment 1, brain slices from the PrL (ranging from +5.00 to +2.5 mm AP, relative to Bregma) and PVT (ranging from -1.00 to -4.00 mm AP, relative to Bregma) were placed into well plates containing cryoprotectant and stored at -20°C until further processing.

**Immunohistochemistry.** The accuracy of DREADD expression in the PrL and PVT was assessed using immunohistochemical staining methods to visualize the mCherry protein in DREADD-expressing neurons. Free-floating coronal sections from the PrL and PVT were first rinsed 3 times in 0.1M PBS (pH= 7.4). Endogenous peroxidase activity was blocked by incubating sections in 1% H<sub>2</sub>O<sub>2</sub> for 10 minutes, followed by 3 additional rinses. To prevent non-specific binding of the secondary antibody, sections were incubated in 0.1M PBS containing 0.4% Triton X-100 (TX) and 2.5% Normal Donkey Serum (NDS) (Jackson ImmunoResearch Laboratories, Inc., West Grove, PA). Sections were then incubated overnight at room temperature in primary antibody (rabbit anti-mCherry, Abcam, Cambridge, UK, diluted 1: 30,000) in 0.1M PBS + 0.4% TX + 1% NDS. On the following day, sections were rinsed again before being incubated for 1h in a biotinylated donkey anti-rabbit secondary antibody (Jackson Immunoresearch, West Grove, PA, diluted 1: 500) in 0.1M PBS + 0.4% TX + 1% NDS. Peroxidase staining was obtained with a standard avidin-biotin procedure using the Vectastain Elite ABC Kit (Vector Laboratories, Inc., Burlingame, CA diluted 1: 1000 for A and B). Chromogenic

reaction occurred by incubating sections in a 0.1M PBS solution containing 0.02% 3,3'-diaminobenzidine tetrahydrochloride (DAB) and 0.012% H<sub>2</sub>O<sub>2</sub>. Sections were rinsed and stored at 4°C until mounted, air dried and cover-slipped with Permount (Thermo-Fisher Scientific, Waltham, MA). Bright-field images containing the PrL, aPVT and pPVT were captured using a Leica DM1000 light microscope (Leica-Microsystems, Wetzlar, GER) and were analyzed by two experimenters blind to the experimental groups.

Experimenters assigned a score of 0 - 3 to each image according to both the intensity and location of DREADD expression in the areas of interest (Figure 1-figure supplement 1). A score of 0 was assigned to subjects that had no DREADD expression or off target DREADD expression (e.g. expression outside target boundaries) in either the PrL or the aPVT and pPVT; a score of 1 was assigned to subjects that had adequate DREADD expression in both the PrL and PVT; a score of 2 was assigned to subjects that had a strong DREADD expression in either the PrL or PVT; a score of 3 was assigned to subjects that had a strong DREADD expression in both the PrL and PVT.

Representative images of what was considered adequate DREADD expression are shown in Figure 1-figure supplement 1. Rats that had a score of 0 (n= 65) were excluded from the statistical analysis.

For representative purposes, in a subset of brains DREADD expression in the PrL and PVT was assessed using immunofluorescence to visualize mCherry in DREADD-expressing neurons. Sections were incubated overnight at room temperature in primary antibody (rabbit anti-mCherry, Abcam, Cambridge, UK, diluted 1: 500) in 0.1M PBS + 0.4% TX + 2.5% NDS. On the following day, sections were rinsed and incubated for 2h in a biotinylated donkey anti-rabbit secondary antibody (Jackson Immunoresearch, West Grove, PA, diluted 1: 500) in 0.1M PBS + 0.4% TX + 2.5% NDS. Sections were rinsed again and then incubated for 1h in Alexa Fluor™ 594-conjugated streptavidin (Thermo Fisher Scientific, Waltham, MA, diluted 1:1000) in 0.1M PBS + 0.4% TX. Sections were then mounted onto slides and cover-slipped with ProLong™ Gold Antifade Mountant (Thermo Fisher Scientific, Waltham, MA). Fluorescent pictures containing the PrL, aPVT and pPVT were captured using a Zeiss AxioImager M2 motorized fluorescent microscope with Apotome structured illumination (Carl Zeiss, Sweden).



**Statistical analyses.** For Experiment 1, acquisition of sign- and goal-tracking behavior during sessions 1-5 of PavCA training was analyzed using the following dependent variables: number of lever contacts, number of magazine entries during the CS period, probability to contact the lever, probability to enter the magazine during the CS period, latency to contact the lever and latency to enter the magazine during the CS period. To assess differences in the acquisition of sign- and goal-tracking behaviors during PavCA training, a linear mixed-effects model (LMM) with a Restricted Maximum Likelihood (REML) estimation method was used. Session was used as the repeated variable and GPCR (three levels: Gq, Gi and No-DREADD), phenotype (two levels: GT, ST) and treatment (two levels: CNO, VEH) as between-subject variables. Before choosing the final model, all covariance structures were explored for each one of the dependent variables and the best-fitting model was chosen by selecting the lowest Akaike Information criterion (AIC) (Verbeke & Molenberghs, 2009; Duricki et al., 2016). To ensure that subjects were counterbalanced between different experimental groups after PavCA training, the average PavCA index from session 4 and 5 was analyzed by using a 3-way ANOVA with phenotype (GT, ST), GPCR (Gq, Gi and No-DREADD) and treatment (CNO, VEH) as independent variables. It should be noted that comparisons between phenotypes and treatment groups were only made for the acquisition phase of PavCA behavior, as it is important to demonstrate that the phenotypes differ in their conditioned response and that the classification and assignment to GPCR (Gq, Gi, No-DREADD) and treatment (CNO, VEH) groups was balanced within phenotype according to these measures.

To ensure that sign- and goal-tracking conditioned responses were stable after DREADD incubation, we analyzed the PavCA index during each daily session of rescreening (session 6-10). For each GPCR and Phenotype using a LMM with REML as the estimation method. Session (five levels: session 6,7,8,9,10) was used as the repeated measure and treatment (two levels: CNO, VEH) as the between subject variable.

To test the effects of either stimulation (i.e. Gq-expressing rats) or inhibition (i.e. Gi-expressing rats) of the PrL-PVT pathway on the expression of a Pavlovian conditioned approach response, we compared the average PavCA index during PavCA rescreening



(sessions 6-10, prior to treatment) with the average PavCA index during test sessions (11-16, concurrent with treatment). Thus, the PavCA index from sessions 6-10 of PavCA rescreening and from the PavCA test (sessions 11-16) were averaged and compared for each GPCR and Phenotype using a LMM with REML as the estimation method. Session (two levels: rescreening, test) was used as the repeated measure and treatment (two levels: CNO, VEH) as the between-subject variable.

To test the specificity of the effects of the stimulation or inhibition of the PrL-PVT pathway on Pavlovian conditioned approach behaviors, we analyzed the magazine entries during the intertrial interval (ITI), which can be used as an index of general locomotor activity (Campus et al., 2016; Fraser et al., 2016). For each GPCR and Phenotype we used a LMM with REML as the estimation method to assess the effect of the manipulation of the PRL-PVT pathway on the average ITI magazine entries during PavCA rescreening (sessions 6-10, prior to treatment) with the average ITI magazine entries during test (sessions 11-16, concurrent with treatment). Session (two levels: rescreening, test) was used as the repeated measure and treatment (two levels: CNO, VEH) as the between-subject variable.

To analyze the effect of CNO administration on the behaviors expressed during the CRT test, nose pokes, lever contacts and incentive value index during CRT were analyzed separately for each GPCR and Phenotype. Nose pokes were analyzed using a two-way ANOVA with nose port (two levels: active, inactive) and treatment (two levels: CNO, VEH) as independent variables. Differences between CNO- and VEH-treated animals for lever contacts and the incentive value index were analyzed using an unpaired t-test.

For Experiment 2, Acquisition of sign- and goal-tracking behavior during sessions 1-3 of PavCA training was analyzed using the same dependent variables described above: number of lever contacts, number of magazine entries during the CS period, probability to contact the lever, probability to enter the magazine during the CS period, latency to contact the lever and latency to enter the magazine during the CS period. To assess differences in the acquisition of sign- and goal-tracking behaviors during PavCA training a LMM with a REML estimation method was used. Session was used as the repeated

variable and group (two levels: GT-Gi, ST-Gq) and treatment (two levels: CNO, VEH) as between-subject variables. The best fitting model was chosen by selecting the lowest AIC. To explore the existence of baseline differences between different experimental groups after PavCA training, the PavCA index from session 3 was analyzed by using a 2-way ANOVA with group (GT-Gi, ST-Gq), and treatment (CNO, VEH) as independent variables. For the same reasons as those described above for Experiment 1, this is the only analysis for which the two groups were directly compared. To analyze the effects of CNO administration within each group, the PavCA index expressed after the initial acquisition (Session 3) was compared with the PavCA index expressed after 3 days of treatment (Session 6). Session (3 vs. 6) was used as the repeated measure and treatment (CNO, VEH) as the between-subject variable within each group. Data were analyzed using a LMM with REML as estimation method.

Microdialysis data were also analyzed separately for ST-Gq and GT-Gi rats. The following neurotransmitters were analyzed: gamma-Aminobutyric acid (GABA), glutamate (Glu), dopamine (DA), serotonin (5-HT) and acetylcholine (ACh). For all neurotransmitters analyzed, differences between treatment groups in the baseline levels were analyzed using an unpaired sample t-test. Levels of neurotransmitters obtained during the subsequent block of collection (pre-PavCA and PavCA) were expressed in terms of percentage (%) change from baseline. Differences in the % change from baseline for each neurotransmitter were analyzed by using a LMM with a REML estimation method. Time was used as a repeated measure and treatment (CNO, VEH) as a between-subject independent variable. Differences in the averaged % change from baseline during PavCA training were analyzed using a t-test. The relationship between DA and PavCA index during session 6 of PavCA training was examined using a linear regression with % change of DA as the predictor and PavCA index as the dependent variable. A one-way ANOVA with PavCA index as the dependent variable and treatment (VEH, CNO) as the independent variable, with % DA as a covariate, was used to determine if the relationship between DA and PavCA index changed as a function of treatment.

For all LMM and ANOVA analyses, normality was checked using a Shapiro-Wilk test. If normality was violated, the presence of outliers and influential data points was explored

using boxplots (Tukey, 1977). Data points that fell below -1.5 or above +1.5 times the interquartile range (IQR) were considered as outliers and excluded from the statistical analysis in order to meet the assumption of normality. Using these criteria, 11 subjects were excluded from Experiment 1 (GT-Gq=2; ST-Gi=3; GT-Gi=3; ST-No DREADD=1; GT-No DREADD=2), resulting in an n=115 for the PavCA index analyses. Importantly, however, the significant results of the statistical analyses were the same with or without the outliers. Graphical representations and tables include only those data without outliers. All statistical analyses were performed using IBM SPSS Statistics 24 (IBM, Armonk, NY, USA). Alpha was set at 0.05. When significant main effects or interactions were detected, Bonferroni post-hoc comparisons were performed. Effects sizes for pairwise comparisons were calculated using Cohen's d (Cohen, 1988), as previously reported (Hughson et al., 2019). Effect sizes  $<0.2$  were considered small, effect sizes  $\geq 0.2 \leq 0.8$  were considered medium, and effect sizes  $>0.8$  were considered large (Cohen, 1988; Sawilowsky, 2009). Optimal sample sizes (n) were determined a-priori based on previous publications (Haight et al., 2017; Kuhn et al., 2018). However, because it is impossible to predict how many rats will be classified as STs or GTs, and how many animals will be excluded after the histological analysis, the final sample sizes varied considerably among experimental groups (see Subjects section). Given the variability in sample sizes, the power to correctly reject the null hypothesis ( $1-\beta$ ) was calculated by post-hoc power analyses using G\*Power (Faul et al., 2007; Faul et al., 2009). The threshold for statistical power to be considered sufficient was set at 0.80 (Cohen, 1992). For illustration of group comparisons, individual data points are plotted with mean and SEM overlaid on a violin plot to show the distribution of the dependent variable. For statistical analysis with multiple factors, representation of main effects is omitted, and symbols indicate significant pairwise comparisons following a significant interaction. All graphical representations of the data were made using Prism 8 (Graphpad Software, San Diego, CA). Violin plots and individual data points with mean  $\pm$  SEM were overlaid using Inkscape 0.92 for Windows.

## **Experiment 1 detailed methods**

**PavCA rescreening and test.** The experimental design for Experiment 1 is summarized in Figure 1a. Following recovery from surgery and DREADD incubation, rats underwent 5 PavCA rescreening sessions (sessions 6-10) to determine if their initial behavioral characterization as a ST or GT had changed. To habituate rats to the injection procedures, all rats received an injection (i.p.) of vehicle 25 minutes prior to session 10. The PavCA testing phase occurred during sessions 11-16, and rats received administration of CNO or VEH 25 minutes prior to each session. For all analyses, session (rescreening vs. test) was used as the within-subject independent variable and treatment (CNO, VEH) as the between-subject independent variable. PavCA index is presented as the primary dependent variable in the main text, but analyses for other dependent variables are included in Supplemental Results.

**Conditioned reinforcement test.** The day after the completion of PavCA training, rats were exposed to a conditioned reinforcement test (CRT) as described previously (Hughson et al., 2019). The CRT can be used for assessing the ability of incentive conditioned stimuli to act as a reinforcer and support the learning of a new instrumental response in the absence of a primary reinforcer (Robinson & Flagel, 2009). Briefly, for CRT conditioning chambers were reconfigured such that the food magazine was removed, and the retractable lever was placed in the center of the wall flanked by a nose-port on either side. Nose pokes into one port (active port), resulted in the presentation of the illuminated lever for 2s on a fixed-ratio 1 (FR1) schedule; nose pokes into the opposite port (inactive port) had no consequence. To minimize side bias, the active port was always placed opposite the side the lever-CS was located during PavCA sessions. The conditioned reinforcement test lasted 40 min, and the following behaviors were recorded: number of lever contacts, number of nose pokes into the active port (active nose pokes) and number of nose pokes into the inactive port (inactive nose pokes). A composite score, the incentive value index (Hughson et al., 2019), was then used to capture all of the behavioral measures obtained during the conditioned reinforcement test: ((active nose pokes + lever presses) – (inactive nose pokes)).

## **Experiment 2 detailed methods**

**Drugs.** All chemicals, drugs, and reagents were purchased from Sigma-Aldrich unless otherwise noted. HPLC grade water was purchased from Thermo-Fisher Scientific (Waltham, MA) and HPLC grade acetonitrile was purchased from VWR (Radnor, PA).

**PavCA training.** The experimental design for Experiment 2 is summarized in Figure 5a. PavCA training apparatus and experimental procedures were the same as described above. However, during all PavCA training sessions rats were tethered to a swiveled arm to habituate them to the microdialysis procedures. The tethered rats could explore the chamber freely. In this experiment, rats were phenotyped as ST or GT following just 3 initial PavCA sessions. Since the sign- and goal-tracking conditioned responses are not fully developed by session 3, we used a different cut-off for classifying rats as STs or GTs. For this study rats with a PavCA index  $\geq +0.20$  were classified as STs and rats with a score  $\leq -0.20$  were classified as GTs. Rats received CNO or VEH 25 minutes prior to the PavCA training sessions 4-6.

**Microdialysis.** Microdialysis methods are depicted in Figure 5e. Extracellular levels of neurotransmitters in the NAcS were assessed during session 6 of PavCA training. The percentage change from baseline was measured for the following neurotransmitters: GABA, glutamate (Glu), dopamine (DA), serotonin (5-HT) and acetylcholine (ACh). Briefly, before session 6 of PavCA training, microdialysis probes were inserted in the NAcS and perfused at a rate of 1.0  $\mu\text{l}/\text{min}$  with artificial cerebrospinal fluid (aCSF, pH 7.4) containing, in mM: 145.00 NaCl, 2.68 KCl, 1.10 MgSO<sub>4</sub>, 1.22 CaCl<sub>2</sub>, 0.50 NaH<sub>2</sub>PO<sub>4</sub>, 1.55 Na<sub>2</sub>HPO<sub>4</sub>. Immediately before starting perfusion aCSF was added with 0.25 mM ascorbic acid to prevent dopamine oxidation. Dialysate samples (5  $\mu\text{l}$ ) were collected every 5 minutes, beginning 120 minutes after probe insertion. Baseline samples were collected for 30 minutes (6 fractions). After this time rats were injected with CNO or VEH and samples were collected for an additional 25 minutes (5 fractions). PavCA training started 25 minutes after CNO or VEH injections. Samples were collected during the PavCA session for a total time of 35 minutes (PavCA samples, 7 fractions). After collection, samples were derivatized as described below and stored at -80°C until they were analyzed by high-performance liquid chromatography-tandem mass spectrometry (HPLC-MS).

**Benzoyl chloride derivatization.** Benzoyl chloride derivatization of dialysates and internal standards was performed using a modified version of the methods described in (Song et al., 2012). Calibration curves were generated using standards at 0, 0.1, 0.5, 1, 5, 10, and 20 nM for DA. Internal standards (IS) stock solutions were derivatized by adding 100 mM sodium carbonate monohydrate buffer, followed by 2%  $^{13}\text{C}_6$  benzoyl chloride in acetonitrile with 0.1% formic acid. The IS stock was then diluted 100-fold in a 50:50 acetonitrile/ $\text{H}_2\text{O}$  solution containing 1% sulfuric acid. Calibration standards and dialysate samples were derivatized by adding them with 100 mM sodium carbonate buffer, 2% benzoyl chloride (in acetonitrile), and an internal standard in a 2:1:1:1 ratio.

**HPLC-MS.** A Thermo Finnigan Surveyor Plus HPLC system was used for analyzing microdialysis samples. Neurochemical separation was achieved with a Phenomenex (Torrance, CA) Kinetex biphenyl LC column (50 × 2.1 mm, 1.7  $\mu\text{m}$  particle size, 100 Å pore size). Mobile phase A was 10 mM ammonium formate and 0.15% (v/v) formic acid in HPLC water. Mobile phase B was acetonitrile. The mobile phase gradient for all of the analytes was: initial, 0% B; 0.1 min, 10% B; 0.12 min, 10% B; 2.3 min, 20% B; 3.7 min, 50% B; 4.0 min, 80% B; 4.5 min, 100% B; 5.0 min 100% B; 6.5 min, 0% B. The flow rate was 200  $\mu\text{L}/\text{min}$ , and the sample injection volume was 7  $\mu\text{L}$ . The autosampler and column were maintained at ambient temperature throughout the analysis. A Thermo Finnigan TSQ Quantum Ultra triple quadrupole mass spectrometer operating in positive mode was used for detection. Electrospray ionization (ESI) voltage was 3.5 kV, and heated ESI probe (HESI-I) was set at 300°C. Capillary temperature was 350°C, and sheath gas, aux gas, and ion sweep gas were maintained at 25, 15, and 0 arb, respectively. The intercycle delay was 200 ms. Automated peak integration was performed using Thermo X Calibur Quan Browser version 2.1. All peaks were visually inspected to ensure proper integration. Calibration curves were constructed based on peak area ratio ( $P_{\text{analyte}}/P_{\text{IS}}$ ) versus concentrations by linear regression.

**Immunohistochemistry and histology.** Upon completion of experimental procedures, brain tissue was processed for the assessment of DREADD expression as described above. To identify the placement of the microdialysis probes, brain slices containing the NAc shell (bregma 1.70-1.00 mm AP) were mounted onto glass slides, stained using Cresyl-violet (Sigma-Aldrich, St. Louis, MO) and cover-slipped with a toluene-based

solution (Permout, Fisher Scientific, Fair Lawns, NJ). Verification of probe placement was done using a Leica DM1000 light microscope (Buffalo Grove, IL) by two experimenters blind to experimental groups. Only rats with probe placements within the NAc shell were included in the statistical analyses.

## **Acknowledgments**

Funding for this work was provided by the National Institute on Drug Abuse (NIDA) branch of the National Institutes of Health: R01-DA038599 (SBF), T32-DA007821 (BNK, SAL) and T32-DA007268 (IRC, AP).

We would like to acknowledge the technical assistance of Katie Long, Marin Klumpner and Maurice Chojecki throughout the course of these experiments, as well as assistance from Zhongyan Gong. In addition, we would like to thank Katie Holl for maintenance of the heterogenous stock rat colony at the Medical College of Wisconsin, and Matthew Folz for assistance with confocal imaging in the Molecular and Behavioral Neuroscience Institute at the University of Michigan. We would also like to acknowledge the Flagel Lab members who helped build the foundation for this work, including Dr. Joshua Haight and Kurt Fraser.

## **Competing interests**

The authors report no biomedical financial interests or potential conflicts of interest.



## References

- Beas, Wright, Skirzewski, Leng, Hyun, Koita, *et al.* (2018). The locus coeruleus drives disinhibition in the midline thalamus via a dopaminergic mechanism. *Nat Neurosci*, 21(7), 963-973.
- Berendse, & Groenewegen. (1990). Organization of the thalamostriatal projections in the rat, with special emphasis on the ventral striatum. *J Comp Neurol*, 299(2), 187-228.
- Berridge. (2009). 'Liking' and 'wanting' food rewards: brain substrates and roles in eating disorders. *Physiol Behav*, 97(5), 537-550.
- Berridge, & Robinson. (2016). Liking, wanting, and the incentive-sensitization theory of addiction. *Am Psychol*, 71(8), 670-679.
- Berridge, Robinson, & Aldridge. (2009). Dissecting components of reward: 'liking', 'wanting', and learning. *Curr Opin Pharmacol*, 9(1), 65-73.
- Boender, de Jong, Boekhoudt, Luijendijk, van der Plasse, & Adan. (2014). Combined use of the canine adenovirus-2 and DREADD-technology to activate specific neural pathways in vivo. *PLoS One*, 9(4), e95392.
- Campus, Accoto, Maiolati, Latagliata, & Orsini. (2016). Role of prefrontal 5-HT in the strain-dependent variation in sign-tracking behavior of C57BL/6 and DBA/2 mice. *Psychopharmacology (Berl)*, 233(7), 1157-1169.
- Cardinal, Parkinson, Hall, & Everitt. (2002). Emotion and motivation: the role of the amygdala, ventral striatum, and prefrontal cortex. *Neurosci Biobehav Rev*, 26(3), 321-352.
- Choi, Davis, Magrisso, Fitzgerald, Lipton, & Benoit. (2012). Orexin signaling in the paraventricular thalamic nucleus modulates mesolimbic dopamine and hedonic feeding in the rat. *Neuroscience*, 210, 243-248.
- Choi, Jean-Richard-Dit-Bressel, Clifford, & McNally. (2019). Paraventricular thalamus controls behavior during motivational conflict. *J Neurosci*.
- Choi, & McNally. (2017). Paraventricular Thalamus Balances Danger and Reward. *J Neurosci*, 37(11), 3018-3029.
- Clark, Collins, Sanford, & Phillips. (2013). Dopamine encoding of Pavlovian incentive stimuli diminishes with extended training. *J Neurosci*, 33(8), 3526-3532.
- Coffey, Schumacher, Stasiewicz, Henslee, Baillie, & Landy. (2010). Craving and physiological reactivity to trauma and alcohol cues in posttraumatic stress disorder and alcohol dependence. *Exp Clin Psychopharmacol*, 18(4), 340-349.
- Cohen. (1988). *Statistical power analysis for the behavioral sciences* (2nd ed.). Hillsdale, N.J.: L. Erlbaum Associates.
- Cohen. (1992). A power primer. *Psychol Bull*, 112(1), 155-159.
- Do-Monte, & Kirouac. (2017). Boosting of Thalamic D2 Dopaminergic Transmission: A Potential Strategy for Drug-Seeking Attenuation. *eNeuro*, 4(6).
- Do-Monte, Minier-Toribio, Quinones-Laracuenta, Medina-Colon, & Quirk. (2017). Thalamic Regulation of Sucrose Seeking during Unexpected Reward Omission. *Neuron*, 94(2), 388-400 e384.
- Do-Monte, Quinones-Laracuenta, & Quirk. (2015). A temporal shift in the circuits mediating retrieval of fear memory. *Nature*, 519(7544), 460-463.

- Duricki, Soleman, & Moon. (2016). Analysis of longitudinal data from animals with missing values using SPSS. *Nat Protoc*, 11(6), 1112-1129.
- Faul, Erdfelder, Buchner, & Lang. (2009). Statistical power analyses using G\*Power 3.1: tests for correlation and regression analyses. *Behav Res Methods*, 41(4), 1149-1160.
- Faul, Erdfelder, Lang, & Buchner. (2007). G\*Power 3: a flexible statistical power analysis program for the social, behavioral, and biomedical sciences. *Behav Res Methods*, 39(2), 175-191.
- Flagel, Akil, & Robinson. (2009). Individual differences in the attribution of incentive salience to reward-related cues: Implications for addiction. *Neuropharmacology*, 56 Suppl 1, 139-148.
- Flagel, Cameron, Pickup, Watson, Akil, & Robinson. (2011a). A food predictive cue must be attributed with incentive salience for it to induce c-fos mRNA expression in cortico-striatal-thalamic brain regions. *Neuroscience*, 196, 80-96.
- Flagel, Clark, Robinson, Mayo, Czuj, Willuhn, et al. (2011b). A selective role for dopamine in stimulus-reward learning. *Nature*, 469(7328), 53-57.
- Flagel, Watson, Robinson, & Akil. (2007). Individual differences in the propensity to approach signals vs goals promote different adaptations in the dopamine system of rats. *Psychopharmacology (Berl)*, 191(3), 599-607.
- Fraser, Haight, Gardner, & Flagel. (2016). Examining the role of dopamine D2 and D3 receptors in Pavlovian conditioned approach behaviors. *Behav Brain Res*, 305, 87-99.
- Giannotti, Barry, Siemsen, Peters, & McGinty. (2018). Divergent Prelimbic Cortical Pathways Interact with BDNF to Regulate Cocaine-seeking. *J Neurosci*, 38(42), 8956-8966.
- Haight, & Flagel. (2014). A potential role for the paraventricular nucleus of the thalamus in mediating individual variation in Pavlovian conditioned responses. *Front Behav Neurosci*, 8, 79.
- Haight, Fraser, Akil, & Flagel. (2015). Lesions of the paraventricular nucleus of the thalamus differentially affect sign- and goal-tracking conditioned responses. *Eur J Neurosci*, 42(7), 2478-2488.
- Haight, Fuller, Fraser, & Flagel. (2017). A food-predictive cue attributed with incentive salience engages subcortical afferents and efferents of the paraventricular nucleus of the thalamus. *Neuroscience*, 340, 135-152.
- Hsu, & Price. (2007). Midline and intralaminar thalamic connections with the orbital and medial prefrontal networks in macaque monkeys. *J Comp Neurol*, 504(2), 89-111.
- Hsu, & Price. (2009). Paraventricular thalamic nucleus: subcortical connections and innervation by serotonin, orexin, and corticotropin-releasing hormone in macaque monkeys. *J Comp Neurol*, 512(6), 825-848.
- Hughson, Horvath, Holl, Palmer, Solberg Woods, Robinson, et al. (2019). Incentive salience attribution, "sensation-seeking" and "novelty-seeking" are independent traits in a large sample of male and female heterogeneous stock rats. *Sci Rep*, 9(1), 2351.

- Jones, Kilpatrick, & Phillipson. (1989). Regulation of dopamine function in the nucleus accumbens of the rat by the thalamic paraventricular nucleus and adjacent midline nuclei. *Exp Brain Res*, 76(3), 572-580.
- Kerstetter, Wunsch, Nakata, Donckels, Neumaier, & Ferguson. (2016). Corticostriatal Afferents Modulate Responsiveness to Psychostimulant Drugs and Drug-Associated Stimuli. *Neuropsychopharmacology*, 41(4), 1128-1137.
- Kirouac. (2015). Placing the paraventricular nucleus of the thalamus within the brain circuits that control behavior. *Neurosci Biobehav Rev*, 56, 315-329.
- Koshy Cherian, Kucinski, Pitchers, Yegla, Parikh, Kim, et al. (2017). Unresponsive Choline Transporter as a Trait Neuromarker and a Causal Mediator of Bottom-Up Attentional Biases. *J Neurosci*, 37(11), 2947-2959.
- Kuhn, Klumpner, Covelo, Campus, & Flagel. (2018). Transient inactivation of the paraventricular nucleus of the thalamus enhances cue-induced reinstatement in goal-trackers, but not sign-trackers. *Psychopharmacology (Berl)*, 235(4), 999-1014.
- Kwako, Momenan, Grodin, Litten, Koob, & Goldman. (2017). Addictions Neuroclinical Assessment: A reverse translational approach. *Neuropharmacology*, 122, 254-264.
- Li, & Kirouac. (2008). Projections from the paraventricular nucleus of the thalamus to the forebrain, with special emphasis on the extended amygdala. *J Comp Neurol*, 506(2), 263-287.
- Li, & Kirouac. (2012). Sources of inputs to the anterior and posterior aspects of the paraventricular nucleus of the thalamus. *Brain Struct Funct*, 217(2), 257-273.
- Limbrick-Oldfield, Mick, Cocks, McGonigle, Sharman, Goldstone, et al. (2017). Neural substrates of cue reactivity and craving in gambling disorder. *Transl Psychiatry*, 7(1), e992.
- MacNiven, Jensen, Borg, Padula, Humphreys, & Knutson. (2018). Association of Neural Responses to Drug Cues With Subsequent Relapse to Stimulant Use. *JAMA Netw Open*, 1(8), e186466.
- Mason, O'Sullivan, Blackburn, Bentall, & El-Deredy. (2012). I want it now! Neural correlates of hypersensitivity to immediate reward in hypomania. *Biol Psychiatry*, 71(6), 530-537.
- Matzeu, Cauvi, Kerr, Weiss, & Martin-Fardon. (2017). The paraventricular nucleus of the thalamus is differentially recruited by stimuli conditioned to the availability of cocaine versus palatable food. *Addict Biol*, 22(1), 70-77.
- Matzeu, Weiss, & Martin-Fardon. (2015). Transient inactivation of the posterior paraventricular nucleus of the thalamus blocks cocaine-seeking behavior. *Neurosci Lett*, 608, 34-39.
- Meyer, Lovic, Saunders, Yager, Flagel, Morrow, et al. (2012). Quantifying individual variation in the propensity to attribute incentive salience to reward cues. *PLoS One*, 7(6), e38987.
- Millan, Ong, & McNally. (2017). Paraventricular thalamus: Gateway to feeding, appetitive motivation, and drug addiction. *Prog Brain Res*, 235, 113-137.
- Otis, Namboodiri, Matan, Voets, Mohorn, Kosyk, et al. (2017). Prefrontal cortex output circuits guide reward seeking through divergent cue encoding. *Nature*, 543(7643), 103-107.

- Paolone, Angelakos, Meyer, Robinson, & Sarter. (2013). Cholinergic control over attention in rats prone to attribute incentive salience to reward cues. *J Neurosci*, 33(19), 8321-8335.
- Parsons, Li, & Kirouac. (2007). Functional and anatomical connection between the paraventricular nucleus of the thalamus and dopamine fibers of the nucleus accumbens. *J Comp Neurol*, 500(6), 1050-1063.
- Perez, & Lodge. (2018). Convergent Inputs from the Hippocampus and Thalamus to the Nucleus Accumbens Regulate Dopamine Neuron Activity. *J Neurosci*, 38(50), 10607-10618.
- Pinto, Jankowski, & Sesack. (2003). Projections from the paraventricular nucleus of the thalamus to the rat prefrontal cortex and nucleus accumbens shell: ultrastructural characteristics and spatial relationships with dopamine afferents. *J Comp Neurol*, 459(2), 142-155.
- Pool, Sennwald, Delplanque, Brosch, & Sander. (2016). Measuring wanting and liking from animals to humans: A systematic review. *Neurosci Biobehav Rev*, 63, 124-142.
- Robinson, & Berridge. (1993). The neural basis of drug craving: an incentive-sensitization theory of addiction. *Brain Res Brain Res Rev*, 18(3), 247-291.
- Robinson, & Berridge. (2008). Review. The incentive sensitization theory of addiction: some current issues. *Philos Trans R Soc Lond B Biol Sci*, 363(1507), 3137-3146.
- Robinson, & Flagel. (2009). Dissociating the predictive and incentive motivational properties of reward-related cues through the study of individual differences. *Biol Psychiatry*, 65(10), 869-873.
- Robinson, Robinson, & Berridge. (2014). Incentive Salience in Addiction and Over-Consumption. *Interdisciplinary Science of Consumption*, 185-197.
- Saunders, & Robinson. (2012). The role of dopamine in the accumbens core in the expression of Pavlovian-conditioned responses. *Eur J Neurosci*, 36(4), 2521-2532.
- Sawilowsky. (2009). New Effect Size Rules of Thumb. *Journal of Modern Applied Statistical Methods*, 8(2), 2.
- Singer, Guptaroy, Austin, Wohl, Lovic, Seiler, et al. (2016). Individual variation in incentive salience attribution and accumbens dopamine transporter expression and function. *Eur J Neurosci*, 43(5), 662-670.
- Song, Mabrouk, Hershey, & Kennedy. (2012). In vivo neurochemical monitoring using benzoyl chloride derivatization and liquid chromatography-mass spectrometry. *Anal Chem*, 84(1), 412-419.
- Soudais, Laplace-Builhe, Kissa, & Kremer. (2001). Preferential transduction of neurons by canine adenovirus vectors and their efficient retrograde transport in vivo. *Faseb j*, 15(12), 2283-2285.
- Tibboel, De Houwer, & Van Bockstaele. (2015). Implicit measures of "wanting" and "liking" in humans. *Neurosci Biobehav Rev*, 57, 350-364.
- Tukey. (1977). *Exploratory Data Analysis*. Reading, MA: Addison-Wesley.
- Verbeke, & Molenberghs. (2009). *Linear mixed models for longitudinal data*. New York: Springer.
- Vertes, & Hoover. (2008). Projections of the paraventricular and paratenial nuclei of the dorsal midline thalamus in the rat. *J Comp Neurol*, 508(2), 212-237.

- Whitton, Treadway, & Pizzagalli. (2015). Reward processing dysfunction in major depression, bipolar disorder and schizophrenia. *Curr Opin Psychiatry*, 28(1), 7-12.
- Yager, Pitchers, Flagel, & Robinson. (2015). Individual variation in the motivational and neurobiological effects of an opioid cue. *Neuropsychopharmacology*, 40(5), 1269-1277.
- Zhu, Nachtrab, Keyes, Allen, Luo, & Chen. (2018). Dynamic salience processing in paraventricular thalamus gates associative learning. *Science*, 362(6413), 423-429.
- Zhu, Wienecke, Nachtrab, & Chen. (2016). A thalamic input to the nucleus accumbens mediates opiate dependence. *Nature*, 530(7589), 219-222.



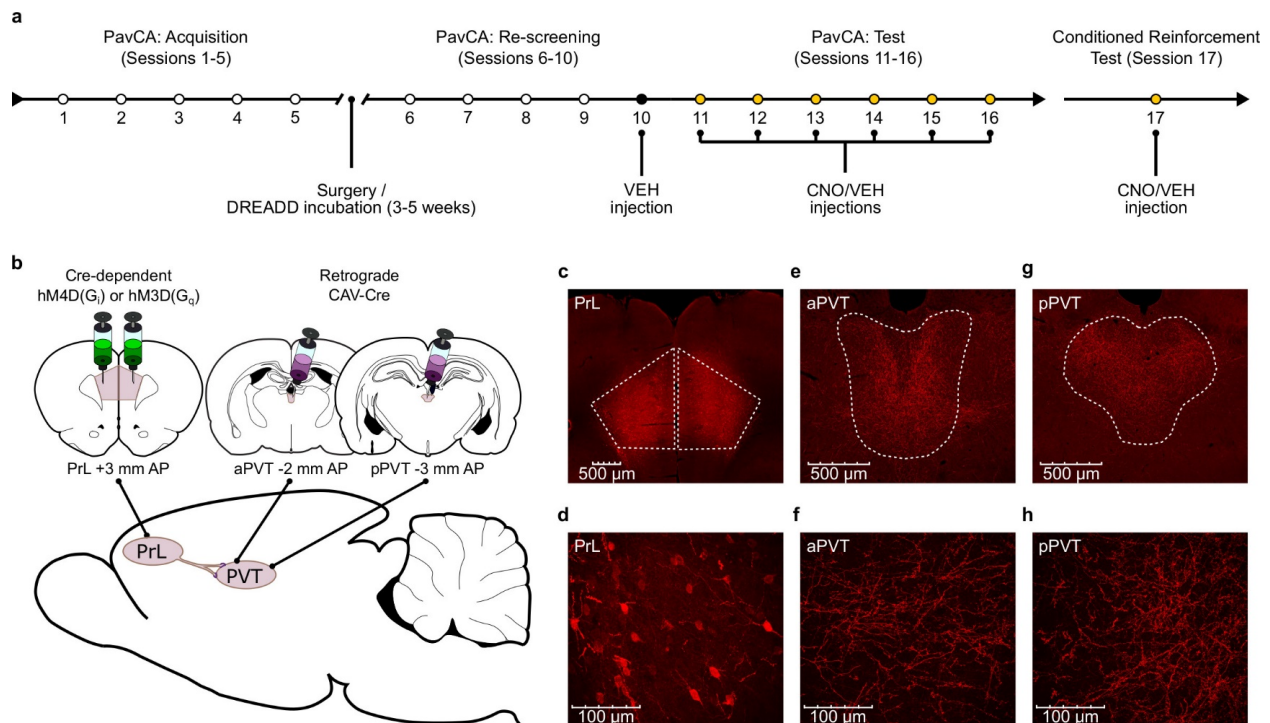

**Figure 1. Experiment 1 methods.** **a)** Timeline of the experimental procedures. Rats were trained in a Pavlovian Conditioned Approach (PavCA) paradigm for 5 consecutive days (Acquisition, Sessions 1-5) and phenotyped as sign- (STs) or goal-trackers (GTs). Following acquisition, STs and GTs underwent DREADD surgeries for delivering Gi- or Gq- DREADDs in neurons of the prelimbic cortex (PrL) projecting to the paraventricular nucleus of the thalamus (PVT). Incubation time for DREADD expression was 3-5 weeks. After Incubation, rats were re-screened for sign- and goal-tracking behavior (Re-screening, Sessions 6-10). All rats received an i.p. VEH injection 25 minutes before session 10 to habituate them to the injection procedure. CNO (3mg/kg) or VEH were then administered i.p. every day during the Test phase (Sessions 11-16), 25 minutes before the start of each session. 24 hours after the last session of PavCA, rats received an additional injection of CNO or VEH 25 minutes before being exposed to a conditioned reinforcement test (CRT, Session 17). **b)** Schematic of the dual-vector strategy used for expressing Gi- or Gq- DREADDs in the PrL-PVT pathway. **c,d)** Photomicrographs representing mCherry expression in pyramidal neurons of the PrL projecting to the PVT at **(c)** 4x magnification and **(d)** 40x magnification. **e,f)** Photomicrographs of mCherry expression representing terminal fibers in the anterior PVT coming from the PrL at **(e)** 10x magnification and at **(f)** 40x magnification. **g,h)**

Photomicrographs of mCherry expression representing terminal fibers in the posterior PVT coming from the PrL at **(g)** 10x magnification and **(h)** 40x magnification.



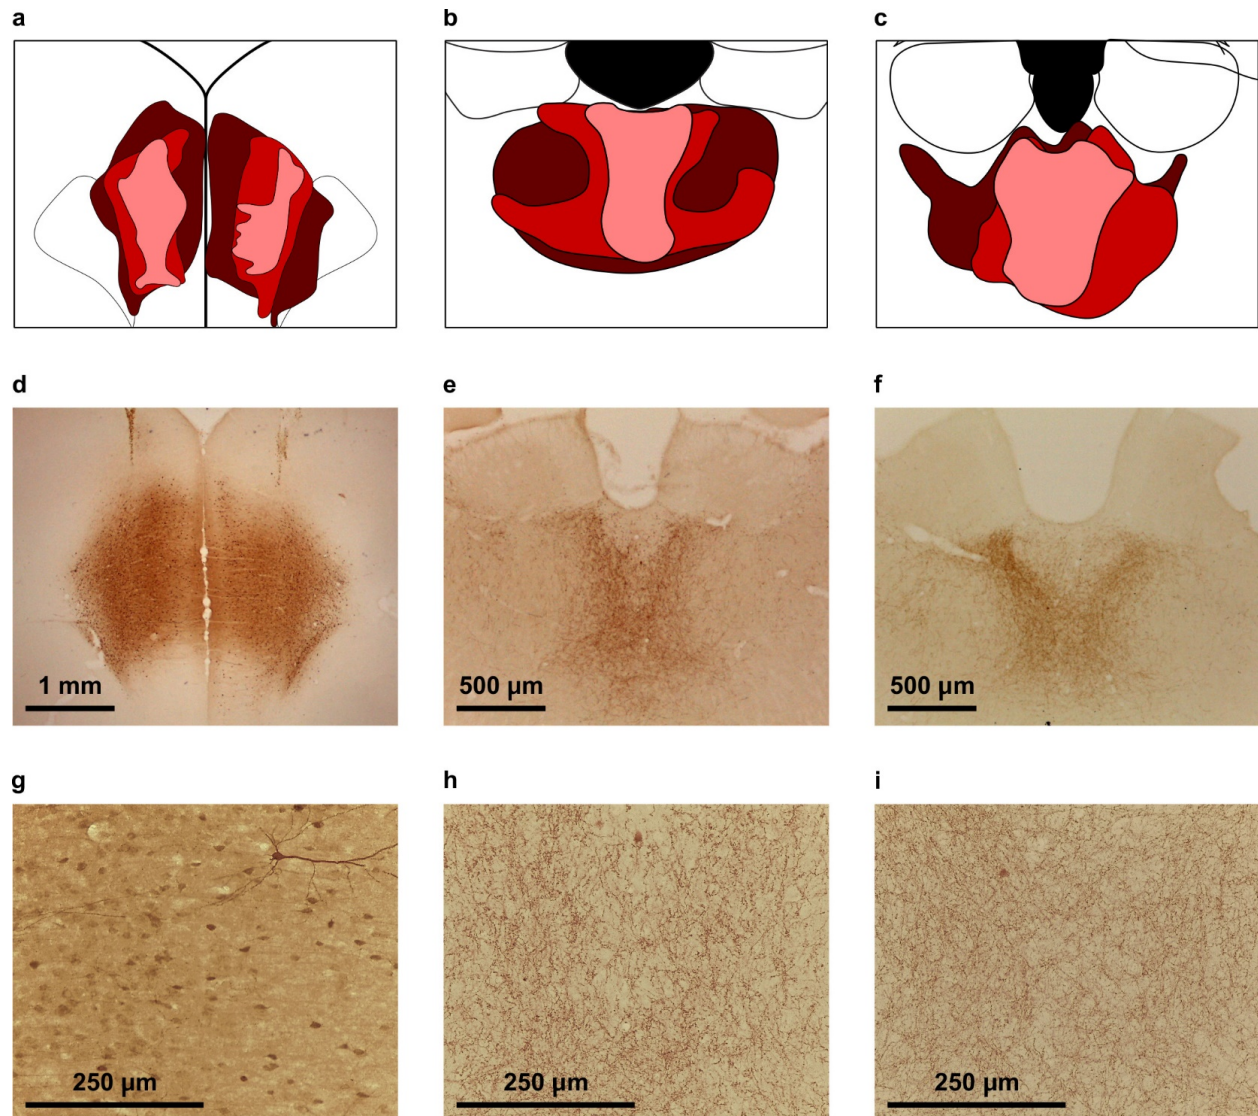

**Figure 1-figure supplement 1. Representative photomicrographs of mCherry expression.** **a,b,c)** Schematic representation of the viral spread in the **(a)** PrL, **(b)** aPVT and **(c)** pPVT. Subjects included in the final analyses were assigned a score of 1 - 3 according to both the intensity and spread of DREADD expression in the areas of interest. Subjects with the least expression (represented by the pink areas) were assigned a score of 1, subjects with medium expression (represented by the red areas) were assigned a score of 2, and subjects with the most expression (represented by the maroon areas) were assigned a score of 3. **d,g)** Photomicrographs representing mCherry expression in the pyramidal neurons of the PrL projecting to the PVT at **(d)** 2.5x magnification and **(g)** 20x magnification. **e,h)** Photomicrographs of mCherry

expression representing terminal fibers in the aPVT coming from the PrL at **(e)** 5x magnification and at **(h)** 20x magnification. **f,i)** Photomicrographs of mCherry expression representing terminal fibers in the aPVT coming from the PrL at **(f)** 5x magnification and **(i)** 20x magnification.

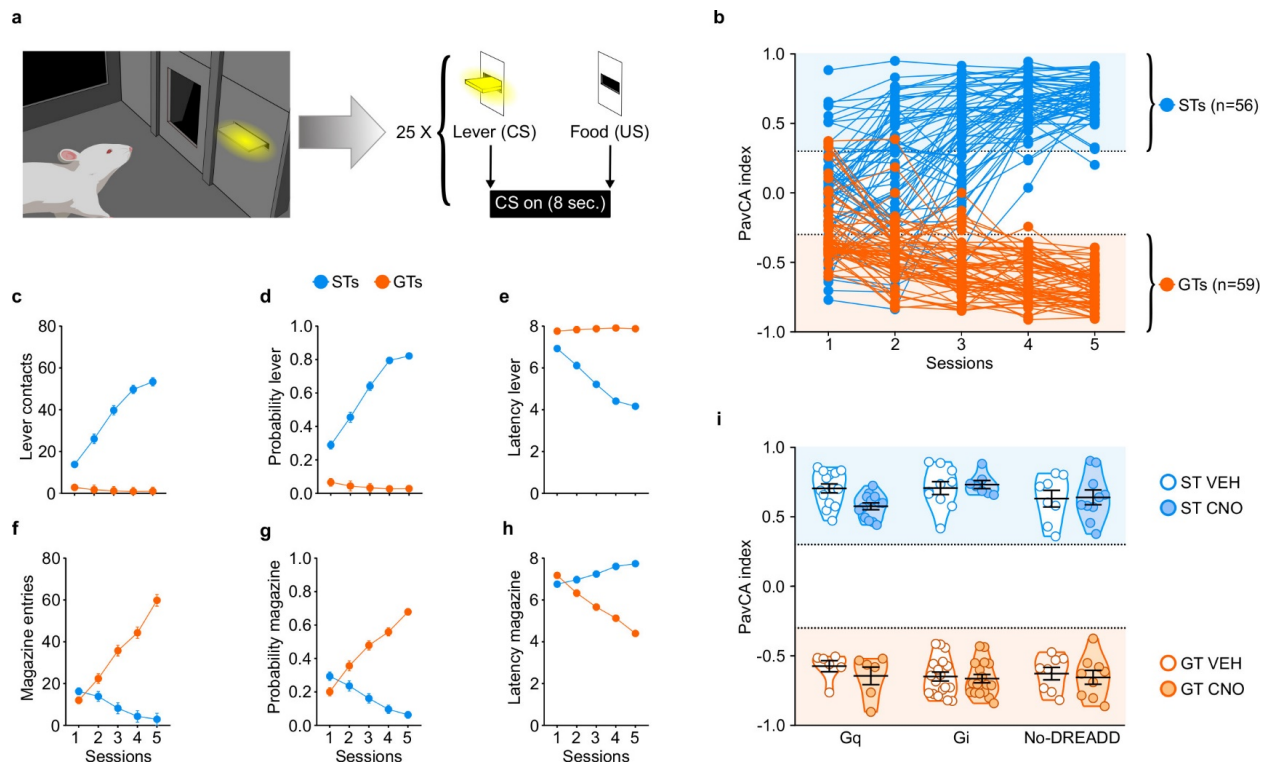

**Figure 2. Acquisition of sign- and goal-tracking behaviors during 5 sessions of Pavlovian Conditioned Approach (PavCA) training (i.e. prior to surgery or CNO administration).** **a**) Schematic representing the PavCA task. Rats were presented with an illuminated lever (conditioned stimulus, CS) for 8 sec followed by the delivery of a food pellet (unconditioned stimulus, US) immediately upon lever-CS retraction. Each PavCA session consisted of 25 lever-food pairings. **b**) PavCA index scores (composite index of Pavlovian conditioned approach behavior) for individual rats across 5 sessions of Pavlovian conditioning. PavCA index from session 4-5 were averaged to determine the behavioral phenotype. Rats with a PavCA score  $<-0.3$  were classified as goal-trackers (GTs,  $n=59$ ), rats with a PavCA score  $>+0.3$  were classified as sign-trackers (STs,  $n=56$ ). **c-e**) Acquisition of lever-directed behaviors (sign-tracking) during PavCA training. Mean  $\pm$  SEM for (c) number of lever contacts, (d) probability to contact the lever, and (e) latency to contact the lever. **f-h**) Acquisition of magazine-directed behaviors (goal-tracking) during PavCA training. Mean  $\pm$  SEM for (f) number of magazine entries, (g) probability to enter the magazine, and (h) latency to enter the magazine. **i**) Data are expressed as individual data points with mean  $\pm$  SEM plotted on violin plots for PavCA index. Rats with similar PavCA scores were assigned to receive

different G-protein coupled receptor (GPCR; Gi, Gq or no-DREADD) and different treatment (CNO, VEH). Baseline differences in PavCA index between experimental groups were assessed by using a 3-way ANOVA with Phenotype (GT, ST), GPCR (Gi, Gq and no-DREADD) and Treatment (CNO, VEH) as independent variables and PavCA index as the dependent variable. A significant effect of Phenotype was found ( $p < 0.001$ ), but no significant differences between experimental groups and no significant interactions. Sample sizes: GT-Gi=32, GT-Gq=12, ST-Gi=14, ST-Gq=25, GT-no DREADD=15, ST-no DREADD=17.

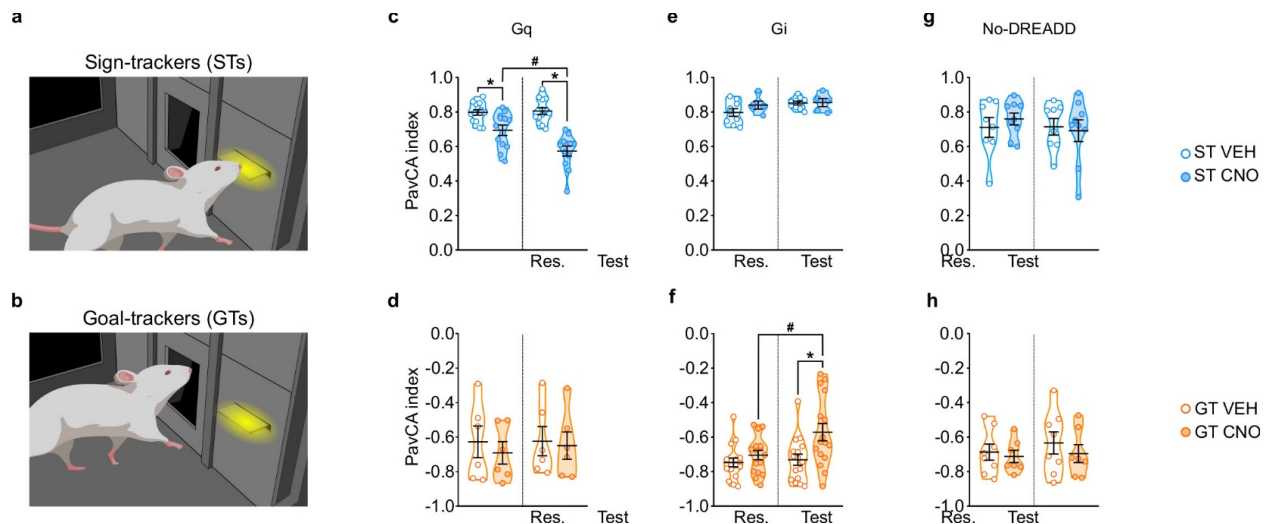

**Figure 3. Chemogenetic stimulation of the PrL-PVT pathway decreases sign-tracking behavior in sign-trackers, while chemogenetic inhibition of the PrL-PVT pathway increases sign-tracking behavior in goal-trackers. a,b)** Drawing representative of sign-tracking (a) and goal-tracking (b) conditioned responses during PavCA training. **c-h)** Data are expressed as individual data points with mean  $\pm$  SEM plotted on violin plots for PavCA index during Rescreening (Res., average of PCA Sessions 6-10) and Test (average of PCA Sessions 11-16) periods. **c,d)** Chemogenetic stimulation (Gq) of the PrL-PVT circuit decreases the PavCA index in (c) sign-trackers, but has no effect in (d) goal-trackers. There was a significant treatment x session interaction in sign-trackers ( $p < 0.01$ ). Pairwise comparisons showed that CNO decreased the PavCA index in STs ( $*p < 0.001$ , CNO vs. VEH;  $\#p < 0.001$ , Test vs. Res.). **e,f)** Chemogenetic inhibition of the PrL-PVT circuit has no effect on (e) sign-trackers, but increases the PavCA index in (f) goal-trackers. There was a significant treatment x session interaction in goal-trackers ( $*p < 0.012$  CNO vs. VEH;  $\#p < 0.002$  Test vs. Res.). **g,h)** Effects of CNO administration on the PavCA index in non-DREADD expressing (g) STs and GTs (h). When DREADD receptors were not expressed in the brain, CNO had no effect on the PavCA index in either sign-trackers nor goal-trackers. Sample sizes: GT-Gi=32, GT-Gq=12, ST-Gi=14, ST-Gq=25, GT-no DREADD=15, ST-no DREADD=17.

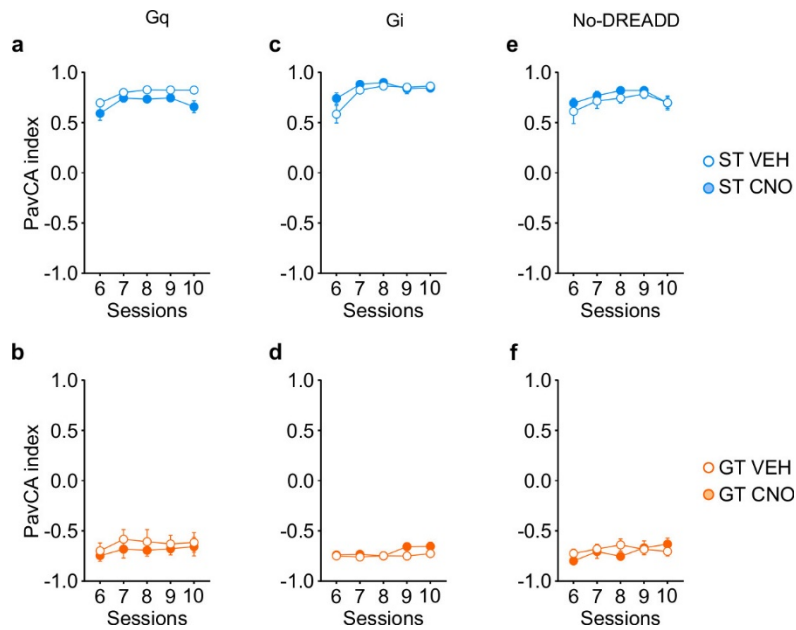

### Figure 3-figure supplement 1. Analysis of Pavlovian conditioned approach

**behaviors during the rescreening phase of the study (PavCA sessions 6-10, prior to treatment).** **a-f)** Data are expressed as mean  $\pm$  SEM of the Pavlovian conditioned Approach (PavCA) index during Rescreening Sessions 6-10 for STs expressing **(a)** Gq, **(c)** Gi or **(e)** No-DREADD in the PrL-PVT pathway. A linear mixed-model analysis revealed a significant effect of session for ST-Gq ( $F_{4,71.508} = 5.400$ ,  $p < 0.001$ ), ST-Gi ( $F_{4,25,678} = 4.990$ ,  $p = 0.004$ ), and ST-No DREADD ( $F_{4,15} = 3.734$ ,  $p = 0.027$ ), indicating that subjects from all groups increased their PavCA index across the 5 rescreening sessions. For ST-Gq there was also a significant effect of treatment ( $F_{1,22.900} = 7.893$ ,  $p = 0.010$ ), indicating that subjects from the CNO group had a lower PavCA index compared to subjects from the VEH group. There was not a significant treatment x session interaction. **b,d,f)** Data are shown for GTs expressing **(b)** Gq, **(d)** Gi or **(f)** No-DREADD in the PrL-PVT pathway. A linear mixed-model analysis revealed no significant effect of session, treatment, nor a significant treatment x session interaction in any of the GT experimental groups.



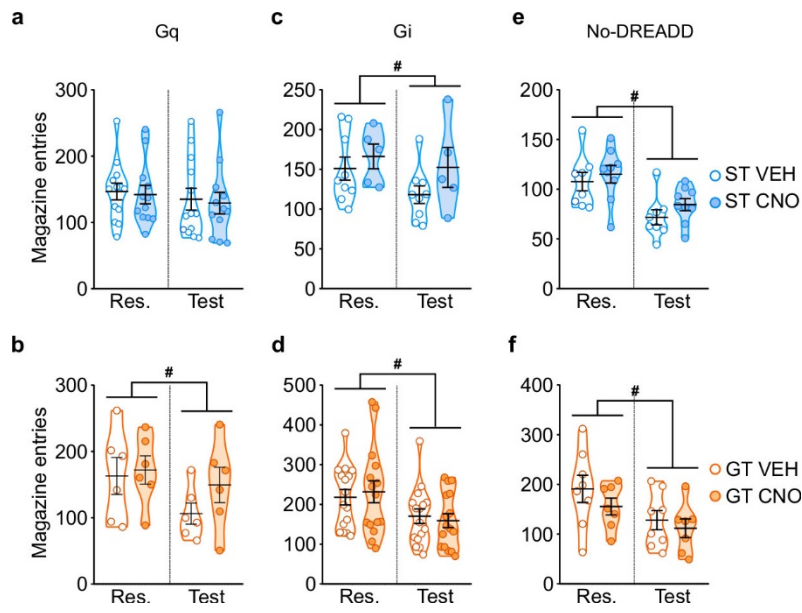

**Figure 3-figure supplement 2. Analysis of magazine entries during the intertrial**

**interval (ITI). a-f)** Data are expressed as individual data points with mean ± SEM

plotted on violin plots for magazine entries during the intertrial interval (ITI) during

Rescreening (Res., average of PCA Sessions 6-10) and Test (average of PCA

Sessions 11-16). **a,b)** Stimulation of the PrL-PVT pathway does not affect behavior

during the intertrial interval of Pavlovian conditioning. For **(a)** STs, no significant effect of

treatment, session, nor treatment x session interactions were found. For **(b)** GTs, there

was no significant effect of treatment, nor a significant treatment x session interaction.

There was, however, a significant effect of session ( $F_{1,10} = 11.556$ ,  $p = 0.007$ ) for GTs,

suggesting that magazine entries during the ITI decrease across training, independent

of treatment. **c,d)** Inhibition of the PrL-PVT pathway does not affect behavior during the

intertrial interval for rats in the Gi-DREADD group. There was not a significant effect of

treatment, nor was there a significant treatment x session interaction for either **(c)** STs

or **(d)** GTs. There was a significant effect of session for both phenotypes (STs:  $F_{1,12}$

$= 5.692$ ,  $p = 0.034$ ; GTs:  $F_{1,30} = 42.243$ ,  $p < 0.001$ ). As above, these data indicate that

magazine entries during the ITI decrease with training, but independent of treatment.

**e,f)** CNO administration in the absence of DREADD receptors does not affect behavior

during the intertrial interval of Pavlovian conditioning. There was not a significant effect

of treatment, nor a significant treatment x session interaction for either **(e)** STs or **(f)**



GTs. Consistent with the data from the Gi-DREADD group, there was a significant effect of session for both STs ( $F_{1,15} = 41.422$ ,  $p < 0.001$ ) and GTs ( $F_{1,13} = 16.420$ ,  $p = 0.001$ ).

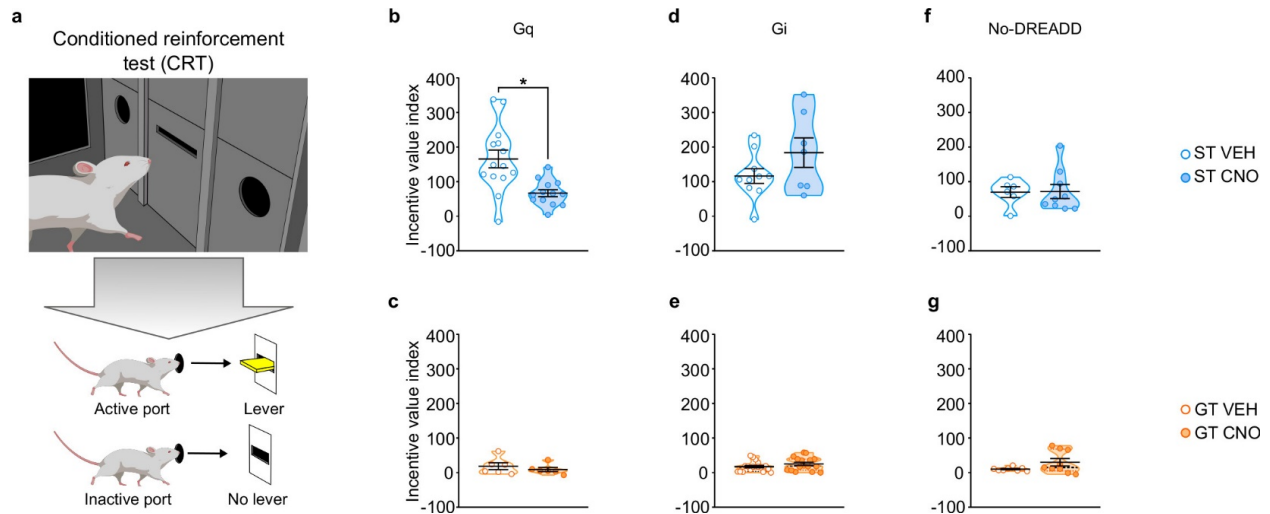

**Figure 4. Chemogenetic stimulation of the PrL-PVT pathway decreases the conditioned reinforcing properties of a reward-paired cue in sign-trackers. a)** Schematic representing the conditioned reinforcement test (CRT). Data are expressed as individual data points with mean  $\pm$  SEM plotted on violin plots for Incentive value index ((active nosepokes + lever presses) – (inactive nosepokes)). **b,c)** Relative to VEH controls, administration of CNO (3 mg/kp, i.p.) significantly decreased the incentive value of the reward cue for **(b)** ST-Gq (\* $p < 0.05$ ), but not **(c)** GT-Gq rats. **d,e)** CNO-induced inhibition of the PrL-PVT circuit did not affect the conditioned reinforcing properties of the reward cue in **(d)** ST-Gi or **(e)** GT-Gi rats. **f,g)** CNO administration did not affect the conditioned reinforcing properties of the reward cue in non-DREADD expressing **(f)** STs or **(g)** GTs. Sample sizes: GT-Gi=32, GT-Gq=12, ST-Gi=14, ST-Gq=25, GT-no DREADD=15, ST-no DREADD=17.

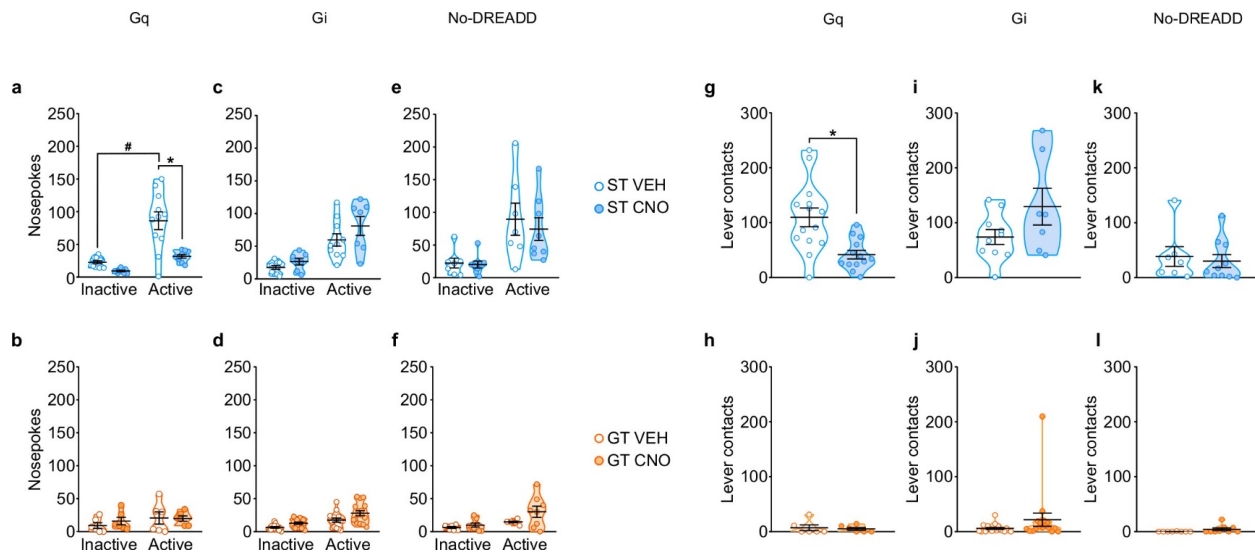

**Figure 4-figure supplement 1. Chemogenetic stimulation of the PrL-PVT pathway decreases the conditioned reinforcing properties of a reward-paired cue in sign-trackers.** Data are expressed as individual data points with mean  $\pm$  SEM plotted on violin plots. **a-f)** Nosepokes into the inactive (left) and active (right) ports during conditioned reinforcement. **a,b)** Relative to VEH controls, administration of CNO (3 mg/kg, i.p.) significantly decreased active nosepokes for **(a)** ST-Gq rats ( $*p < 0.05$  vs. VEH;  $\#p < 0.05$  vs. Inactive), but not **(b)** GT-Gq rats. **c,d)** CNO-induced inhibition of the PrL-PVT circuit did not affect nosepokes in **(c)** ST-Gi or **(d)** GT-Gi rats. **e,f)** CNO administration did not affect nosepokes in non-DREADD expressing **(e)** STs or **(f)** GTs. **g-l)** Lever contacts during conditioned reinforcement. **g,h)** Relative to VEH controls, administration of CNO (3 mg/kg, i.p.) significantly decreased lever contacts for **(g)** ST-Gq rats ( $*p < 0.05$  vs. VEH), but not **(h)** GT-Gq rats. **i,j)** CNO-induced inhibition of the PrL-PVT circuit did not affect lever contacts in **(i)** ST-Gi or **(j)** GT-Gi rats. **k,l)** CNO administration did not affect lever contacts in non-DREADD expressing **(k)** STs or **(l)** GTs.

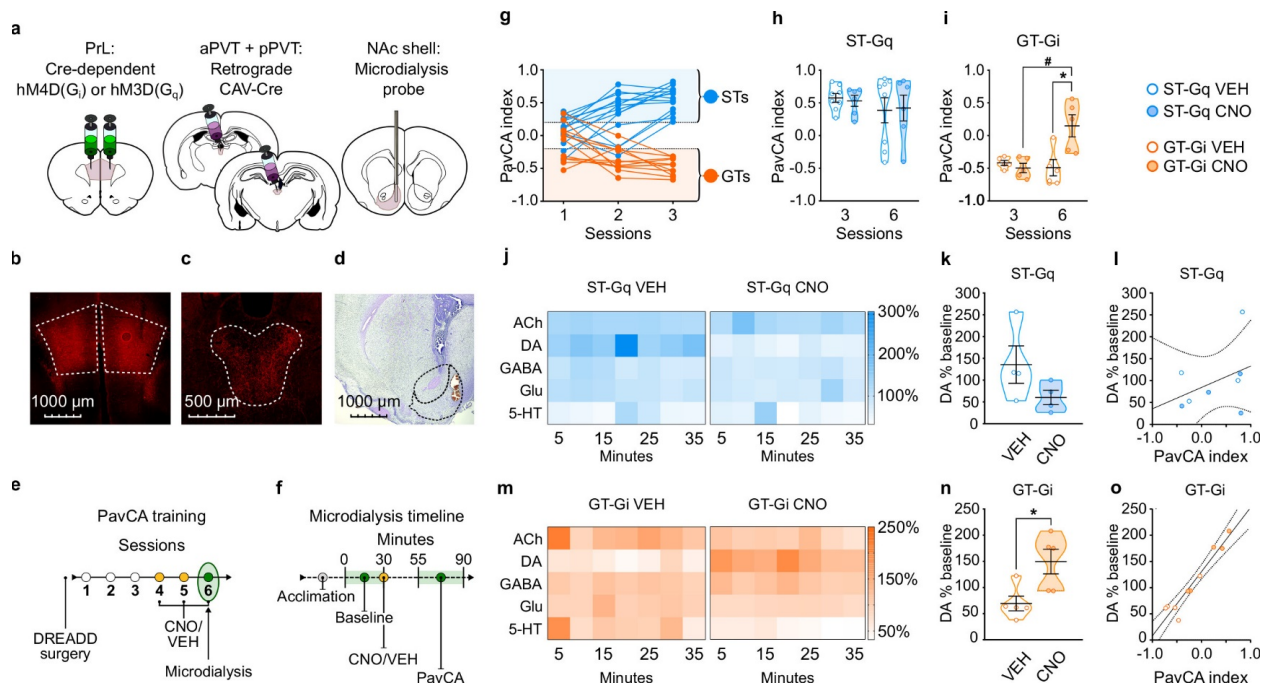

**Figure 5. Experiment 2: Inhibition of the PrL-PVT circuit early in Pavlovian training elicits sign-tracking behavior and increases extracellular levels of dopamine in the nucleus accumbens shell (NAcS) of GT rats.** **a)** Schematic of the cannulation surgery and the dual-vector strategy used for expressing Gi-DREADDs in the PrL-PVT pathway of GTs, or Gq-DREADDs in the PrL-PVT pathway of STs. **b-d)** Representative pictures of coronal brain slices showing mCherry expression in the **(b)** PrL and **(c)** PVT, and the **(d)** placement of the microdialysis probe in the NAcS. **e)** Experimental timeline. After surgery and DREADD incubation, rats were trained in a PavCA task for 3 consecutive Sessions (1-3) and classified as STs or GTs. Rats then received CNO (3mg/kg, i.p.) or vehicle (VEH) 25 minutes before being trained for 3 additional PavCA Sessions (4-6). **f)** Microdialysis timeline. Before the start of Session 6 of PavCA, microdialysis probes were inserted into the guide cannula and rats were left undisturbed for 2 hours before starting sample collection (acclimation period). After acclimation, 6 baseline dialysates were collected over 30 minutes before injecting rats with either CNO or vehicle (VEH). Session 6 of PavCA training started 25 minutes after CNO/VEH injections, and 7 fractions of dialysate were collected during the session. **g)** Individual PavCA index scores during the first 3 sessions of Pavlovian conditioning. Rats with a PavCA index  $<-0.2$  were classified as GTs ( $n=10$ ), rats with a PavCA index  $>+0.2$  were classified as STs ( $n=13$ ). **h,i)** Data are expressed as mean  $\pm$  SEM for

PavCA index. **(h)** CNO during session 6 of training did not affect PavCA index in ST-Gq rats. **(i)** CNO during session 6 of training significantly increased the PavCA index in GT-Gi rats (\* $p=0.016$  vs. VEH; # $p=0.009$  vs. session 3). **(j,m)** Heatmaps showing the relative percent (%) change from baseline of NAc shell acetylcholine (ACh), dopamine (DA), GABA, glutamate (Glu) and serotonin (5-HT) during Session 6 of PavCA training in **(j)** ST-Gq rats (blue) and **(m)** GT-Gi rats (orange). **(k,n)** Mean  $\pm$  SEM levels of DA % change during Session 6 of Pavlovian conditioning in **(k)** ST-Gq and **(n)** GT-Gi rats. There was a significant effect of CNO for GT-Gi rats (\* $p=0.008$ ). **(l,o)** correlations between DA % change from baseline and PavCA index during session 6 of PavCA training. No significant correlation was found in **(l)** ST-Gq. There was a significant positive correlation between percent change in DA and PavCA index in **(o)** GT-Gi rats ( $r^2=0.92$ ;  $p<0.001$ ). Sample sizes: GT-Gi=10; ST-Gq=13 for behavior, 9 for microdialysis data.

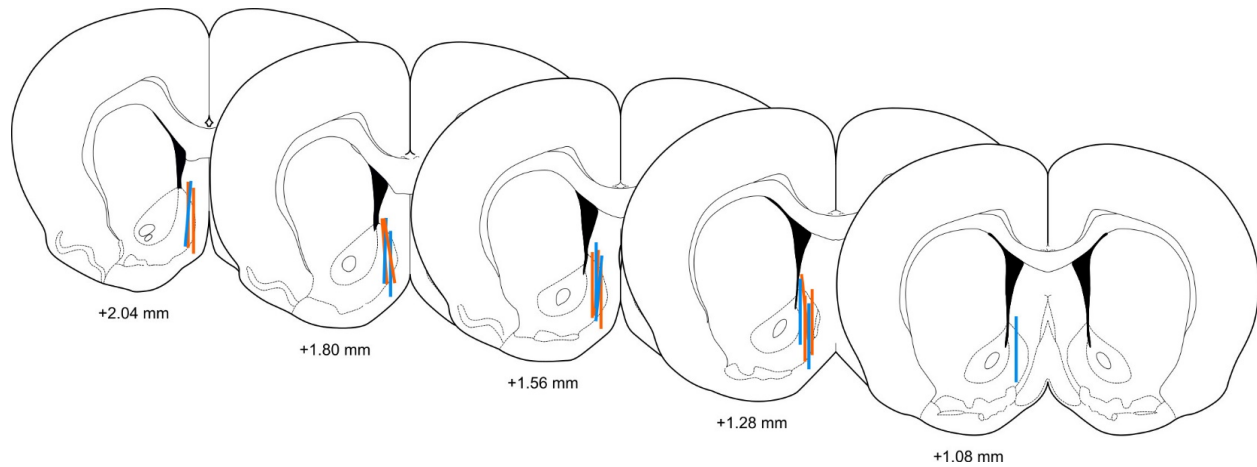

**Figure 5-figure supplement 1. Microdialysis probe placement.** Representative drawing of coronal sections of the brain showing the placement of microdialysis probes in the nucleus accumbens shell. The bars indicate the area of active collection for STs (blue) and GTs (orange). Numbers indicate the approximate distance of the coronal slice relative to bregma.

*Lever-directed behaviors (Sign-tracking)*

|                          |  | <b>ST-Gq</b>        |        |                 |                   |        |                 |               |        |                 |
|--------------------------|--|---------------------|--------|-----------------|-------------------|--------|-----------------|---------------|--------|-----------------|
|                          |  | Lever contacts      |        |                 | Probability lever |        |                 | Latency lever |        |                 |
|                          |  | DF                  | F      | p               | DF                | F      | p               | DF            | F      | p               |
| <i>Treatment</i>         |  | 1,22.854            | 2.347  | 0.139           | 1,25.783          | 4.368  | <b>&lt;0.05</b> | 1,24.682      | 3.673  | 0.067           |
| <i>Session</i>           |  | 4,32.488            | 29.080 | <b>&lt;0.01</b> | 4,56.630          | 53.553 | <b>&lt;0.01</b> | 4,59.141      | 49.482 | <b>&lt;0.01</b> |
| <i>Treatment*Session</i> |  | 4,32.488            | 2.516  | 0.061           | 4,56.630          | 3.734  | <b>&lt;0.01</b> | 4,59.141      | 3.875  | <b>&lt;0.01</b> |
|                          |  | <b>GT-Gq</b>        |        |                 |                   |        |                 |               |        |                 |
|                          |  | Lever contacts      |        |                 | Probability lever |        |                 | Latency lever |        |                 |
|                          |  | DF                  | F      | p               | DF                | F      | p               | DF            | F      | p               |
| <i>Treatment</i>         |  | 1,10.000            | 0.254  | 0.625           | 1,10.000          | 0.023  | 0.883           | 1,10.000      | 0.058  | 0.815           |
| <i>Session</i>           |  | 4,10.000            | 3.717  | <b>&lt;0.05</b> | 4,10.000          | 1.551  | 0.261           | 4,10.000      | 3.193  | 0.062           |
| <i>Treatment*Session</i> |  | 4,10.000            | 1.597  | 0.250           | 4,10.000          | 1.356  | 0.316           | 4,10.000      | 2.296  | 0.131           |
|                          |  | <b>ST-Gi</b>        |        |                 |                   |        |                 |               |        |                 |
|                          |  | Lever contacts      |        |                 | Probability lever |        |                 | Latency lever |        |                 |
|                          |  | DF                  | F      | p               | DF                | F      | p               | DF            | F      | p               |
| <i>Treatment</i>         |  | 1,15.551            | 0.001  | 0.982           | 1,12.941          | 0.113  | 0.742           | 1,12.879      | 0.000  | 0.989           |
| <i>Session</i>           |  | 4,46.408            | 8.800  | <b>&lt;0.01</b> | 4,26.870          | 8.342  | <b>&lt;0.01</b> | 4,33.398      | 16.017 | <b>&lt;0.01</b> |
| <i>Treatment*Session</i> |  | 4,46.408            | 0.832  | 0.512           | 4,26.870          | 1.487  | 0.234           | 4,33.398      | 1.738  | 0.165           |
|                          |  | <b>GT-Gi</b>        |        |                 |                   |        |                 |               |        |                 |
|                          |  | Lever contacts      |        |                 | Probability lever |        |                 | Latency lever |        |                 |
|                          |  | DF                  | F      | p               | DF                | F      | p               | DF            | F      | p               |
| <i>Treatment</i>         |  | 1,29.676            | 0.474  | 0.497           | 1,29.756          | 1.380  | 0.249           | 1,29.580      | 1.184  | 0.285           |
| <i>Session</i>           |  | 4,29.339            | 2.842  | <b>&lt;0.05</b> | 4,29.754          | 4.161  | <b>&lt;0.05</b> | 4,66.666      | 1.612  | 0.182           |
| <i>Treatment*Session</i> |  | 4,29.339            | 0.388  | 0.816           | 4,29.754          | 0.061  | 0.993           | 4,66.666      | 1.205  | 0.317           |
|                          |  | <b>ST-no DREADD</b> |        |                 |                   |        |                 |               |        |                 |
|                          |  | Lever contacts      |        |                 | Probability lever |        |                 | Latency lever |        |                 |
|                          |  | DF                  | F      | p               | DF                | F      | p               | DF            | F      | p               |
| <i>Treatment</i>         |  | 1,19.424            | 0.065  | 0.801           | 1,16.672          | 0.200  | 0.661           | 1,16.238      | 0.079  | 0.782           |
| <i>Session</i>           |  | 4,56.329            | 8.195  | <b>&lt;0.01</b> | 4,46.156          | 18.797 | <b>&lt;0.01</b> | 4,20.367      | 14.434 | <b>&lt;0.01</b> |
| <i>Treatment*Session</i> |  | 4,56.239            | 0.638  | 0.638           | 4,46.156          | 0.840  | 0.507           | 4,20.367      | 1.100  | 0.383           |
|                          |  | <b>GT-no DREADD</b> |        |                 |                   |        |                 |               |        |                 |
|                          |  | Lever contacts      |        |                 | Probability lever |        |                 | Latency lever |        |                 |
|                          |  | DF                  | F      | p               | DF                | F      | p               | DF            | F      | p               |
| <i>Treatment</i>         |  | 1,13.133            | 4.440  | 0.055           | 1,17.211          | 3.680  | 0.072           | 1,18.443      | 3.223  | 0.089           |
| <i>Session</i>           |  | 4,27.745            | 3.580  | <b>&lt;0.05</b> | 4,45.408          | 3.928  | <b>&lt;0.01</b> | 4,28.649      | 3.648  | <b>&lt;0.05</b> |
| <i>Treatment*Session</i> |  | 4,27.745            | 2.663  | 0.053           | 4,45.408          | 2.865  | <b>&lt;0.05</b> | 4,28.649      | 3.475  | <b>&lt;0.05</b> |

**Supplementary file 1. Acquisition of Pavlovian conditioned approach during PavCA Sessions 1-5: lever-directed behaviors.** The results of linear mixed model analyses are shown for the effect of Treatment (VEH vs. CNO) across sessions 1-5 of Pavlovian conditioned approach (PavCA) training for lever-directed behaviors, (lever contacts, probability to contact the lever and latency to contact the lever). Analyses were conducted separately for each experimental group (ST-Gq, GT-Gq, ST-Gi, GT-Gi, ST-no DREADD, GT-no DREADD). Bolded values indicate statistical significance,  $p < 0.05$ .



*Magazine-directed behaviors (Goal-tracking)*

|                          |  | <b>ST-Gq</b>        |        |                 |                      |        |                 |                  |        |                 |
|--------------------------|--|---------------------|--------|-----------------|----------------------|--------|-----------------|------------------|--------|-----------------|
|                          |  | Magazine entries    |        |                 | Probability magazine |        |                 | Latency magazine |        |                 |
|                          |  | DF                  | F      | p               | DF                   | F      | p               | DF               | F      | p               |
| <i>Treatment</i>         |  | 1,23.121            | 3.333  | 0.081           | 1,26.890             | 3.097  | 0.090           | 1,26.238         | 3.305  | 0.081           |
| <i>Session</i>           |  | 4,22.146            | 12.299 | <b>&lt;0.05</b> | 4,40.812             | 13.489 | <b>&lt;0.01</b> | 4,42.943         | 10.076 | <b>&lt;0.01</b> |
| <i>Treatment*Session</i> |  | 4,22.146            | 1.968  | 0.135           | 4,40.812             | 2.993  | <b>&lt;0.05</b> | 4,42.943         | 2.013  | 0.110           |
|                          |  | <b>GT-Gq</b>        |        |                 |                      |        |                 |                  |        |                 |
|                          |  | Magazine entries    |        |                 | Probability magazine |        |                 | Latency magazine |        |                 |
|                          |  | DF                  | F      | p               | DF                   | F      | p               | DF               | F      | p               |
| <i>Treatment</i>         |  | 1,10.820            | 0.744  | 0.407           | 1,9.529              | 0.180  | 0.681           | 1,10.516         | 0.150  | 0.706           |
| <i>Session</i>           |  | 4,11.690            | 18.267 | <b>&lt;0.01</b> | 4,22.183             | 29.082 | <b>&lt;0.01</b> | 4,15.998         | 31.383 | <b>&lt;0.01</b> |
| <i>Treatment*Session</i> |  | 4,11.690            | 0.495  | 0.740           | 4,22.183             | 0.210  | 0.930           | 4,15.998         | 0.238  | 0.913           |
|                          |  | <b>ST-Gi</b>        |        |                 |                      |        |                 |                  |        |                 |
|                          |  | Magazine entries    |        |                 | Probability magazine |        |                 | Latency magazine |        |                 |
|                          |  | DF                  | F      | p               | DF                   | F      | p               | DF               | F      | p               |
| <i>Treatment</i>         |  | 1,12.252            | 0.363  | 0.558           | 1,14.596             | 0.202  | 0.660           | 1,14.197         | 0.729  | 0.407           |
| <i>Session</i>           |  | 4,14.652            | 3.461  | <b>&lt;0.05</b> | 4,25.325             | 5.141  | <b>&lt;0.01</b> | 4,21.601         | 5.225  | <b>&lt;0.01</b> |
| <i>Treatment*Session</i> |  | 4,14.652            | 0.765  | 0.565           | 4,25.325             | 0.759  | 0.561           | 4,21.601         | 0.751  | 0.568           |
|                          |  | <b>GT-Gi</b>        |        |                 |                      |        |                 |                  |        |                 |
|                          |  | Magazine entries    |        |                 | Probability magazine |        |                 | Latency magazine |        |                 |
|                          |  | DF                  | F      | p               | DF                   | F      | p               | DF               | F      | p               |
| <i>Treatment</i>         |  | 1,29.689            | 0.015  | 0.902           | 1,31.280             | 0.300  | 0.588           | 1,31.044         | 0.155  | 0.697           |
| <i>Session</i>           |  | 4,39.931            | 21.667 | <b>&lt;0.01</b> | 4,52.002             | 31.364 | <b>&lt;0.01</b> | 4,47.028         | 30.693 | <b>&lt;0.01</b> |
| <i>Treatment*Session</i> |  | 4,39.931            | 0.296  | 0.879           | 4,52.002             | 0.342  | 0.849           | 4,47.028         | 0.937  | 0.937           |
|                          |  | <b>ST-no DREADD</b> |        |                 |                      |        |                 |                  |        |                 |
|                          |  | Magazine entries    |        |                 | Probability magazine |        |                 | Latency magazine |        |                 |
|                          |  | DF                  | F      | p               | DF                   | F      | p               | DF               | F      | p               |
| <i>Treatment</i>         |  | 1,18.485            | 0.042  | 0.840           | 1,18.503             | 0.903  | 0.354           | 1,20.538         | 1.087  | 0.309           |
| <i>Session</i>           |  | 4,32.474            | 2.128  | 0.100           | 4,35.919             | 2.612  | 0.051           | 4,35.722         | 3.220  | <b>&lt;0.05</b> |
| <i>Treatment*Session</i> |  | 4,32.474            | 1.111  | 0.368           | 4,35.919             | 0.443  | 0.777           | 4,35.722         | 0.447  | 0.773           |
|                          |  | <b>GT-no DREADD</b> |        |                 |                      |        |                 |                  |        |                 |
|                          |  | Magazine entries    |        |                 | Probability magazine |        |                 | Latency magazine |        |                 |
|                          |  | DF                  | F      | p               | DF                   | F      | p               | DF               | F      | p               |
| <i>Treatment</i>         |  | 1,14.876            | 0.748  | 0.401           | 1,15.127             | 0.094  | 0.763           | 1,15.061         | 0.078  | 0.784           |
| <i>Session</i>           |  | 4,24.330            | 14.599 | <b>&lt;0.01</b> | 4,31.623             | 14.955 | <b>&lt;0.01</b> | 4,23.690         | 12.976 | <b>&lt;0.01</b> |
| <i>Treatment*Session</i> |  | 4,24.330            | 1.538  | 0.223           | 4,31.623             | 2.040  | 0.113           | 4,23.690         | 1.730  | 0.177           |

**Supplementary file 2. Acquisition of Pavlovian conditioned approach during PavCA Sessions 1-5: magazine-directed behaviors.** The results of linear mixed model analyses are shown for the effect of Treatment (VEH vs. CNO) across sessions 1-5 of Pavlovian conditioned approach (PavCA) training for magazine-directed behaviors (magazine entries, probability to enter the magazine, and latency to enter the magazine). Analyses were conducted separately for each experimental group (ST-Gq, GT-Gq, ST-Gi, GT-Gi, ST-no DREADD, GT-no DREADD). Bolded values indicate statistical significance,  $p < 0.05$ .

*Lever-directed behaviors (Sign-tracking)*

|                          |  | <b>ST-Gq</b>        |        |                 |                   |        |                 |               |        |                 |
|--------------------------|--|---------------------|--------|-----------------|-------------------|--------|-----------------|---------------|--------|-----------------|
|                          |  | Lever contacts      |        |                 | Probability lever |        |                 | Latency lever |        |                 |
|                          |  | DF                  | F      | p               | DF                | F      | p               | DF            | F      | p               |
| <i>Treatment</i>         |  | 1,23                | 8.533  | <b>&lt;0.05</b> | 1,23              | 21.366 | <b>&lt;0.01</b> | 1,23          | 12.327 | <b>&lt;0.05</b> |
| <i>Session</i>           |  | 1,23                | 7.884  | <b>&lt;0.05</b> | 1,23              | 11.196 | <b>&lt;0.05</b> | 1,23          | 17.735 | <b>&lt;0.01</b> |
| <i>Treatment*Session</i> |  | 1,23                | 3.072  | 0.093           | 1,23              | 9.214  | <b>&lt;0.05</b> | 1,23          | 6.526  | <b>&lt;0.05</b> |
|                          |  | <b>GT-Gq</b>        |        |                 |                   |        |                 |               |        |                 |
|                          |  | Lever contacts      |        |                 | Probability lever |        |                 | Latency lever |        |                 |
|                          |  | DF                  | F      | p               | DF                | F      | p               | DF            | F      | p               |
| <i>Treatment</i>         |  | 1,10                | 0.415  | 0.534           | 1,10              | 0.261  | 0.621           | 1,10          | 0.164  | 0.694           |
| <i>Session</i>           |  | 1,10                | 0.081  | 0.782           | 1,10              | 0.062  | 0.808           | 1,10          | 0.508  | 0.492           |
| <i>Treatment*Session</i> |  | 1,10                | 0.014  | 0.908           | 1,10              | 0.008  | 0.929           | 1,10          | 0.003  | 0.957           |
|                          |  | <b>ST-Gi</b>        |        |                 |                   |        |                 |               |        |                 |
|                          |  | Lever contacts      |        |                 | Probability lever |        |                 | Latency lever |        |                 |
|                          |  | DF                  | F      | p               | DF                | F      | p               | DF            | F      | p               |
| <i>Treatment</i>         |  | 1,12                | 0.683  | 0.425           | 1,12              | 0.135  | 0.720           | 1,12          | 0.389  | 0.545           |
| <i>Session</i>           |  | 1,12                | 1.651  | 0.223           | 1,12              | 0.441  | 0.519           | 1,12          | 2.553  | 0.136           |
| <i>Treatment*Session</i> |  | 1,12                | 0.622  | 0.446           | 1,12              | 0.028  | 0.871           | 1,12          | 0.471  | 0.505           |
|                          |  | <b>GT-Gi</b>        |        |                 |                   |        |                 |               |        |                 |
|                          |  | Lever contacts      |        |                 | Probability lever |        |                 | Latency lever |        |                 |
|                          |  | DF                  | F      | p               | DF                | F      | p               | DF            | F      | p               |
| <i>Treatment</i>         |  | 1,30                | 1.597  | 0.216           | 1,30              | 1.350  | 0.254           | 1,30          | 2.160  | 0.152           |
| <i>Session</i>           |  | 1,30                | 4.595  | <b>&lt;0.05</b> | 1,30              | 5.164  | <b>&lt;0.05</b> | 1,30          | 4.673  | <b>&lt;0.05</b> |
| <i>Treatment*Session</i> |  | 1,30                | 2.870  | 0.101           | 1,30              | 2.918  | 0.098           | 1,30          | 2.333  | 0.137           |
|                          |  | <b>ST-no DREADD</b> |        |                 |                   |        |                 |               |        |                 |
|                          |  | Lever contacts      |        |                 | Probability lever |        |                 | Latency lever |        |                 |
|                          |  | DF                  | F      | p               | DF                | F      | p               | DF            | F      | p               |
| <i>Treatment</i>         |  | 1,15                | 1.322  | 0.268           | 1,15              | 0.089  | 0.769           | 1,15          | 0.014  | 0.909           |
| <i>Session</i>           |  | 1,15                | 18.467 | <b>&lt;0.05</b> | 1,15              | 4.797  | <b>&lt;0.05</b> | 1,15          | 16.326 | <b>&lt;0.05</b> |
| <i>Treatment*Session</i> |  | 1,15                | 1.575  | 0.229           | 1,15              | 1.233  | 0.284           | 1,15          | 1.079  | 0.315           |
|                          |  | <b>GT-no DREADD</b> |        |                 |                   |        |                 |               |        |                 |
|                          |  | Lever contacts      |        |                 | Probability lever |        |                 | Latency lever |        |                 |
|                          |  | DF                  | F      | p               | DF                | F      | p               | DF            | F      | p               |
| <i>Treatment</i>         |  | 1,13                | 0.040  | 0.845           | 1,13              | 0.001  | 0.974           | 1,13          | 0.014  | 0.908           |
| <i>Session</i>           |  | 1,13                | 1.663  | 0.220           | 1,13              | 1.927  | 0.188           | 1,13          | 2.977  | 0.108           |
| <i>Treatment*Session</i> |  | 1,13                | 0.602  | 0.452           | 1,13              | 0.265  | 0.616           | 1,13          | 0.000  | 0.992           |

**Supplementary file 3. PavCA rescreening (Sessions 6-10) vs. PavCA test**

**(Sessions 11-16): lever-directed behaviors.** The results of linear mixed model

analyses are shown for the effect of Treatment (VEH vs. CNO), Session (rescreening

vs, test) and Treatment x Session interaction for lever-directed behaviors (lever

contacts, probability to contact the lever and latency to contact the lever). Analyses

were conducted separately for each experimental group (ST-Gq, GT-Gq, ST-Gi, GT-Gi,

ST-no DREADD, GT-no DREADD). Bolded values indicate statistical significance,

p<0.05.

*Magazine-directed behaviors (Goal-tracking)*

|                          |  | <b>ST-Gq</b>        |       |                 |                      |       |                 |                  |       |                 |
|--------------------------|--|---------------------|-------|-----------------|----------------------|-------|-----------------|------------------|-------|-----------------|
|                          |  | Magazine entries    |       |                 | Probability magazine |       |                 | Latency magazine |       |                 |
|                          |  | DF                  | F     | p               | DF                   | F     | p               | DF               | F     | p               |
| <i>Treatment</i>         |  | 1,23                | 6.277 | <b>&lt;0.05</b> | 1,23                 | 6.674 | <b>&lt;0.05</b> | 1,23             | 8.696 | <b>&lt;0.05</b> |
| <i>Session</i>           |  | 1,23                | 0.056 | 0.815           | 1,23                 | 0.222 | 0.642           | 1,23             | 0.060 | 0.808           |
| <i>Treatment*Session</i> |  | 1,23                | 3.518 | 0.073           | 1,23                 | 5.323 | <b>&lt;0.05</b> | 1,23             | 5.947 | <b>&lt;0.05</b> |
|                          |  | <b>GT-Gq</b>        |       |                 |                      |       |                 |                  |       |                 |
|                          |  | Magazine entries    |       |                 | Probability magazine |       |                 | Latency magazine |       |                 |
|                          |  | DF                  | F     | p               | DF                   | F     | p               | DF               | F     | p               |
| <i>Treatment</i>         |  | 1,10                | 0.574 | 0.466           | 1,10                 | 0.001 | 0.982           | 1,10             | 0.064 | 0.805           |
| <i>Session</i>           |  | 1,10                | 0.078 | 0.786           | 1,10                 | 0.003 | 0.957           | 1,10             | 1.815 | 0.208           |
| <i>Treatment*Session</i> |  | 1,10                | 0.460 | 0.513           | 1,10                 | 0.609 | 0.453           | 1,10             | 0.009 | 0.924           |
|                          |  | <b>ST-Gi</b>        |       |                 |                      |       |                 |                  |       |                 |
|                          |  | Magazine entries    |       |                 | Probability magazine |       |                 | Latency magazine |       |                 |
|                          |  | DF                  | F     | p               | DF                   | F     | p               | DF               | F     | p               |
| <i>Treatment</i>         |  | 1,12                | 1.116 | 0.312           | 1,12                 | 0.439 | 0.520           | 1,12             | 0.046 | 0.834           |
| <i>Session</i>           |  | 1,12                | 6.038 | <b>&lt;0.05</b> | 1,12                 | 7.279 | <b>&lt;0.05</b> | 1,12             | 5.538 | <b>&lt;0.05</b> |
| <i>Treatment*Session</i> |  | 1,12                | 2.502 | 0.140           | 1,12                 | 2.462 | 0.143           | 1,12             | 2.184 | 0.165           |
|                          |  | <b>GT-Gi</b>        |       |                 |                      |       |                 |                  |       |                 |
|                          |  | Magazine entries    |       |                 | Probability magazine |       |                 | Latency magazine |       |                 |
|                          |  | DF                  | F     | p               | DF                   | F     | p               | DF               | F     | p               |
| <i>Treatment</i>         |  | 1,30                | 0.459 | 0.503           | 1,30                 | 3.271 | 0.081           | 1,30             | 3.416 | 0.074           |
| <i>Session</i>           |  | 1,30                | 1.103 | 0.302           | 1,30                 | 1.124 | 0.298           | 1,30             | 5.187 | <b>&lt;0.05</b> |
| <i>Treatment*Session</i> |  | 1,30                | 1.842 | 0.185           | 1,30                 | 1.801 | 0.190           | 1,30             | 2.761 | 0.107           |
|                          |  | <b>ST-no DREADD</b> |       |                 |                      |       |                 |                  |       |                 |
|                          |  | Magazine entries    |       |                 | Probability magazine |       |                 | Latency magazine |       |                 |
|                          |  | DF                  | F     | p               | DF                   | F     | p               | DF               | F     | p               |
| <i>Treatment</i>         |  | 1,15                | 0.352 | 0.562           | 1,15                 | 0.430 | 0.522           | 1,15             | 0.347 | 0.564           |
| <i>Session</i>           |  | 1,15                | 2.447 | 0.139           | 1,15                 | 2.851 | 0.112           | 1,15             | 0.784 | 0.390           |
| <i>Treatment*Session</i> |  | 1,15                | 1.356 | 0.262           | 1,15                 | 1.211 | 0.289           | 1,15             | 0.482 | 0.498           |
|                          |  | <b>GT-no DREADD</b> |       |                 |                      |       |                 |                  |       |                 |
|                          |  | Magazine entries    |       |                 | Probability magazine |       |                 | Latency magazine |       |                 |
|                          |  | DF                  | F     | p               | DF                   | F     | p               | DF               | F     | p               |
| <i>Treatment</i>         |  | 1,13                | 0.490 | 0.496           | 1,13                 | 0.373 | 0.552           | 1,13             | 0.237 | 0.634           |
| <i>Session</i>           |  | 1,13                | 0.198 | 0.664           | 1,13                 | 0.025 | 0.876           | 1,13             | 0.428 | 0.525           |
| <i>Treatment*Session</i> |  | 1,13                | 0.101 | 0.756           | 1,13                 | 0.060 | 0.810           | 1,13             | 0.000 | 0.986           |

**Supplementary file 4. PavCA rescreening (sessions 6-10) vs. PavCA test**

**(sessions 11-16): magazine-directed behaviors.** The results of linear mixed model analyses are shown for the effect of Treatment (VEH vs. CNO), Session (rescreening vs, test) and Treatment x Session interaction for magazine-directed behaviors (magazine entries, probability to enter the magazine and latency to enter the magazine). Analyses were conducted separately for each experimental group (ST-Gq, GT-Gq, ST-Gi, GT-Gi, ST-no DREADD, GT-no DREADD). Bolded values indicate statistical significance,  $p < 0.05$ .

*Lever-directed behaviors (Sign-tracking)*

|                          |  | <b>ST-Gq</b>   |        |                 |                   |        |                 |               |        |                 |
|--------------------------|--|----------------|--------|-----------------|-------------------|--------|-----------------|---------------|--------|-----------------|
|                          |  | Lever contacts |        |                 | Probability lever |        |                 | Latency lever |        |                 |
|                          |  | DF             | F      | p               | DF                | F      | p               | DF            | F      | p               |
| <i>Treatment</i>         |  | 1,12.377       | 4.080  | 0.066           | 1,12,137          | 0.411  | 0.411           | 1,12.402      | 1.481  | 0.246           |
| <i>Session</i>           |  | 2,13.246       | 17.459 | <b>&lt;0.05</b> | 2,15.117          | 29.102 | <b>&lt;0.01</b> | 2,13.358      | 23.444 | <b>&lt;0.01</b> |
| <i>Treatment*Session</i> |  | 2,13.246       | 0.014  | 0.986           | 2,15.117          | 0.179  | 0.838           | 2,13.358      | 0.636  | 0.545           |
|                          |  | <b>GT-Gi</b>   |        |                 |                   |        |                 |               |        |                 |
|                          |  | Lever contacts |        |                 | Probability lever |        |                 | Latency lever |        |                 |
|                          |  | DF             | F      | p               | DF                | F      | p               | DF            | F      | p               |
| <i>Treatment</i>         |  | 1,11.728       | 4.607  | 0.054           | 1,8.748           | 5.054  | 0.052           | 1,10.028      | 5.116  | <b>&lt;0.05</b> |
| <i>Session</i>           |  | 2,18.000       | 3.360  | <b>&lt;0.05</b> | 2,16.264          | 0.655  | 0.533           | 2,16.333      | 1.715  | 0.211           |
| <i>Treatment*Session</i> |  | 2,18.000       | 0.957  | 0.403           | 2,16.264          | 0.143  | 0.868           | 2,16.333      | 0.724  | 0.500           |

**Supplementary file 5. Acquisition of sign-tracking behavior during PavCA**

**Sessions 1-3: lever-directed behaviors.** The results of linear mixed model analyses are shown for the effect of Treatment (VEH vs. CNO) across sessions 1-3 of Pavlovian conditioned approach (PavCA) training for lever-directed behaviors (lever contacts, probability to contact the lever and latency to contact the lever). Analyses were conducted separately for each experimental group (ST-Gq, GT-Gi). Bolded values indicate statistical significance,  $p < 0.05$ .

*Magazine-directed behaviors (Goal-tracking)*

|                          |  | ST-Gq            |       |                 |                      |        |                 |                  |        |                 |
|--------------------------|--|------------------|-------|-----------------|----------------------|--------|-----------------|------------------|--------|-----------------|
|                          |  | Magazine entries |       |                 | Probability magazine |        |                 | Latency magazine |        |                 |
|                          |  | DF               | F     | p               | DF                   | F      | p               | DF               | F      | p               |
| <i>Treatment</i>         |  | 1,12.090         | 1.382 | 0.262           | 1,13.564             | 1.162  | 0.300           | 1,13.282         | 1.171  | 0.299           |
| <i>Session</i>           |  | 2,13.611         | 4.155 | <b>&lt;0.05</b> | 2,24.414             | 1.696  | 0.204           | 2,24.046         | 2.422  | 0.110           |
| <i>Treatment*Session</i> |  | 2,13.611         | 0.480 | 0.629           | 2,24.414             | 0.523  | 0.599           | 2,24.046         | 0.697  | 0.508           |
|                          |  | GT-Gi            |       |                 |                      |        |                 |                  |        |                 |
|                          |  | Magazine entries |       |                 | Probability magazine |        |                 | Latency magazine |        |                 |
|                          |  | DF               | F     | p               | DF                   | F      | p               | DF               | F      | p               |
| <i>Treatment</i>         |  | 1,10.277         | 3.810 | 0.079           | 1,9.381              | 4.416  | 0.064           | 1,9.460          | 4.983  | 0.051           |
| <i>Session</i>           |  | 2,18.000         | 9.671 | <b>&lt;0.05</b> | 2,12.030             | 16.367 | <b>&lt;0.01</b> | 2,11.614         | 15.136 | <b>&lt;0.05</b> |
| <i>Treatment*Session</i> |  | 2,18.000         | 2.501 | 0.110           | 2,12.030             | 1.832  | 0.202           | 2,11.614         | 1.533  | 0.256           |

**Supplementary file 6. Acquisition of sign-tracking behavior during PavCA**

**Sessions 1-3: magazine-directed behaviors.** The results of linear mixed model analyses are shown for the effect of Treatment (VEH vs. CNO) across sessions 1-3 of Pavlovian conditioned approach (PavCA) training for magazine-directed behaviors (magazine entries, probability to enter the magazine and latency to enter the magazine). Analyses were conducted separately for each experimental group (ST-Gq, GT-Gi). Bolded values indicate statistical significance,  $p < 0.05$ .

*Lever-directed behaviors (Sign-tracking)*

|                          |  | ST-Gq          |        |                 |                   |        |                 |               |        |                 |
|--------------------------|--|----------------|--------|-----------------|-------------------|--------|-----------------|---------------|--------|-----------------|
|                          |  | Lever contacts |        |                 | Probability lever |        |                 | Latency lever |        |                 |
|                          |  | DF             | F      | p               | DF                | F      | p               | DF            | F      | p               |
| <i>Treatment</i>         |  | 1,12           | 0.028  | 0.870           | 1,12              | 0.142  | 0.713           | 1,12          | 0.039  | 0.847           |
| <i>Session</i>           |  | 1,12           | 0.244  | 0.630           | 1,12              | 0.163  | 0.694           | 1,12          | 0.164  | 0.692           |
| <i>Treatment*Session</i> |  | 1,12           | 2.244  | 0.160           | 1,12              | 0.007  | 0.937           | 1,12          | 0.007  | 0.934           |
|                          |  | GT-Gi          |        |                 |                   |        |                 |               |        |                 |
|                          |  | Lever contacts |        |                 | Probability lever |        |                 | Latency lever |        |                 |
|                          |  | DF             | F      | p               | DF                | F      | p               | DF            | F      | p               |
| <i>Treatment</i>         |  | 1,8            | 23.653 | <b>&lt;0.01</b> | 1,8               | 22.304 | <b>&lt;0.01</b> | 1,8           | 19.311 | <b>&lt;0.05</b> |
| <i>Session</i>           |  | 1,8            | 6.706  | <b>&lt;0.05</b> | 1,8               | 10.769 | <b>&lt;0.05</b> | 1,8           | 9.333  | <b>&lt;0.05</b> |
| <i>Treatment*Session</i> |  | 1,8            | 3.144  | 0.114           | 1,8               | 3.276  | 0.108           | 1,8           | 2.777  | 0.134           |

**Supplementary file 7. Session 3 vs. Session 6 of PavCA training: lever-directed behaviors.** The results of linear mixed model analyses are shown for the effect of Treatment (VEH vs. CNO), Session (3 vs. 6) and Treatment x Session interaction for lever-directed behaviors (lever contacts, probability to contact the lever and latency to contact the lever). Analyses were conducted separately for each experimental group (ST-Gq, GT-Gi). Bolded values indicate statistical significance,  $p < 0.05$ .

*Magazine-directed behaviors (Goal-tracking)*

|                          |  | ST-Gq            |        |                 |                      |       |                 |                  |       |                 |
|--------------------------|--|------------------|--------|-----------------|----------------------|-------|-----------------|------------------|-------|-----------------|
|                          |  | Magazine entries |        |                 | Probability magazine |       |                 | Latency magazine |       |                 |
|                          |  | DF               | F      | p               | DF                   | F     | p               | DF               | F     | p               |
| <i>Treatment</i>         |  | 1,12             | 0.558  | 0.470           | 1,12                 | 0.306 | 0.590           | 1,12             | 0.617 | 0.448           |
| <i>Session</i>           |  | 1,12             | 1.134  | 0.308           | 1,12                 | 0.339 | 0.571           | 1,12             | 1.063 | 0.323           |
| <i>Treatment*Session</i> |  | 1,12             | 0.032  | 0.861           | 1,12                 | 0.059 | 0.812           | 1,12             | 0.000 | 0.987           |
|                          |  | GT-Gi            |        |                 |                      |       |                 |                  |       |                 |
|                          |  | Magazine entries |        |                 | Probability magazine |       |                 | Latency magazine |       |                 |
|                          |  | DF               | F      | p               | DF                   | F     | p               | DF               | F     | p               |
| <i>Treatment</i>         |  | 1,8              | 1.876  | 0.208           | 1,8                  | 4.878 | 0.058           | 1,8              | 3.061 | 0.118           |
| <i>Session</i>           |  | 1,8              | 1.178  | 0.309           | 1,8                  | 1.385 | 0.273           | 1,8              | 0.441 | 0.525           |
| <i>Treatment*Session</i> |  | 1,8              | 13.131 | <b>&lt;0.01</b> | 1,8                  | 6.362 | <b>&lt;0.05</b> | 1,8              | 7.785 | <b>&lt;0.05</b> |

**Supplementary file 8. Session 3 vs. Session 6 of PavCA training: magazine-directed behaviors.** The results of linear mixed model analyses are shown for the effect of Treatment (VEH vs. CNO), Session (3 vs. 6) and Treatment x Session interaction for magazine-directed behaviors (magazine entries, probability to enter the magazine and latency to enter the magazine). Analyses were conducted separately for each experimental group (ST-Gq, GT-Gi). Bolded values indicate statistical significance,  $p < 0.05$ .
